# Supplementary material
Source: PubMed Central journal article supplement (PMC4787580)

**Web figure.** Percentage of individuals in each gene score category among those who developed type 2 diabetes (open bars) and those who remained free from diabetes (closed bars). The risk of developing diabetes according to genetic risk function is shown as a fitted line from a regression analysis.

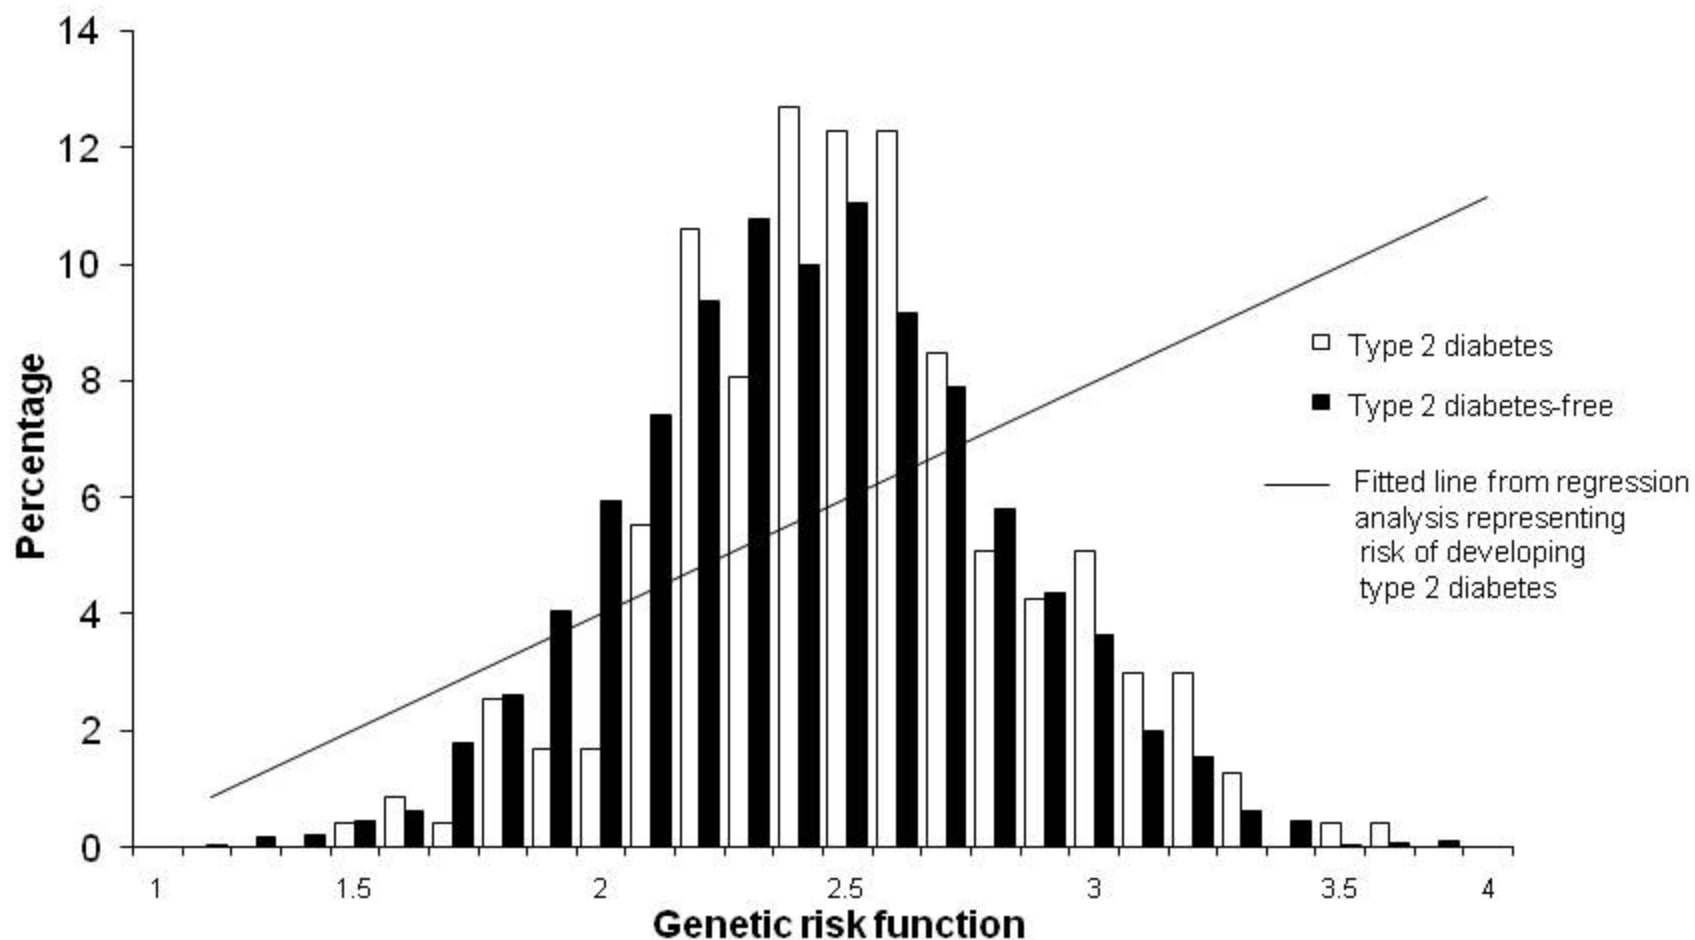

Supplement: talp672709.wf1_default.pdf [file talp672709.wf1_default.pdf]
