# Supplementary material
Source: PubMed Central journal article supplement (PMC4787580)
Supplement: talp672709.wt1_default.pdf [file talp672709.wt1_default.pdf]

**Web table A** Genes associated with type 2 diabetes: Odds ratios from Whitehall II and the odds ratios from published meta-analysis (where possible), providing weighted odds ratios for the genetic risk function.

| Gene                      | rs number   | Genotype in WHII | OR (95% CI) <sup>‡</sup><br>From WHII | Risk allele<br>freq from<br>meta-<br>analysis | Odds ratio<br>from meta-<br>analysis | Comparison      | Weight |
|---------------------------|-------------|------------------|---------------------------------------|-----------------------------------------------|--------------------------------------|-----------------|--------|
| <i>ADAMTS9</i>            | rs4607103   | GG<br>GA<br>AA   | 0.96 (0.79-1.18)<br>P=0.70            | 0.76                                          | 1.09 (1.06-1.12) <sup>1</sup>        | Per allele      | 0.09   |
| <i>BCL11A</i>             | rs10490072  | AA<br>AG<br>GG   | 1.12 (0.92-1.37)<br>P=0.25            | 0.72                                          | 1.05 (1.03-1.08) <sup>1</sup>        | Per allele      | 0.049  |
| <i>CALPN10</i>            | rs3792267   | GG<br>GA<br>AA   | 0.90 (0.71-1.15)<br>P=0.42            | 0.27                                          | 1.18 (1.05-1.32) <sup>2</sup>        | GG vs.<br>GA+AA | 0.166  |
| <i>CDC123/<br/>CAMK1D</i> | rs12779790  | AA<br>AG<br>GG   | 1.06 (0.85-1.33)<br>P=0.61            | 0.18                                          | 1.11 (1.07-1.14) <sup>1</sup>        | Per allele      | 0.10   |
| <i>CDKALI</i>             | rs17036101  | GG<br>GA<br>AA   | 1.08 (0.74-1.58)<br>P=0.68            | 0.93                                          | 1.15 (1.10-1.21) <sup>3</sup>        | Per allele      | 0.140  |
| <i>CDKN2A/2B</i>          | rs10811661  | AA<br>AG<br>GG   | 1.22 (0.95-1.56)<br>P=0.13            | 0.83                                          | 1.20 (1.14-1.25) <sup>3</sup>        | Per allele      | 0.18   |
| <i>FTO</i>                | rs8050136 * | TT<br>TC<br>CC   | 1.04 (0.88-1.23)<br>0.67              | 0.47                                          | 1.17 (1.12-1.22) <sup>4</sup>        | Per allele      | 0.157  |
| <i>HHEX</i>               | rs1111875   | GG               | 0.94 (0.79-1.13)                      | 0.65                                          | 1.15 (1.10-1.19) <sup>3</sup>        | Per allele      | 0.12   |

|                         |            |                |                            |      |                               |                 |       |
|-------------------------|------------|----------------|----------------------------|------|-------------------------------|-----------------|-------|
|                         |            | GA<br>AA       | P=0.52                     |      |                               |                 |       |
| <i>HNF1A</i>            | rs1800574  | CC<br>CT<br>TT | 1.29 (0.79-2.09)<br>P=0.31 | 0.03 | 1.31 (1.08-1.57) <sup>5</sup> | AV+VV vs.<br>AA | 0.270 |
| <i>IGF2BP2</i>          | rs4402960  | CC<br>AC<br>AA | 1.16 (0.97-1.40)<br>P=0.11 | 0.32 | 1.14 (1.11-1.18) <sup>1</sup> | Per allele      | 0.13  |
| <i>JAZF1</i>            | rs864745   | AA<br>AG<br>GG | 1.23 (1.03-1.46)<br>P=0.02 | 0.50 | 1.10(1.07-1.13) <sup>1</sup>  | Per allele      | 0.095 |
| <i>KCNJ11</i>           | rs5215     | CC<br>CT<br>TT | 1.19 (1.00-1.41)<br>P=0.05 | 0.56 | 1.14 (1.10-1.19) <sup>3</sup> | Per allele      | 0.131 |
| <i>NOTCH2</i>           | rs10923931 | CC<br>AC<br>AA | 1.14 (0.87-1.49)<br>P=0.34 | 0.11 | 1.13(1.08-1.17) <sup>3</sup>  | Per allele      | 0.12  |
| <i>PPARG</i>            | rs1801282  | CC<br>CG<br>GG | 0.90 (0.70-1.15)<br>P=0.39 | 0.08 | 1.14 (1.08-1.20) <sup>3</sup> | Per allele      | 0.131 |
| <i>SLC30A8</i>          | rs13266634 | GG<br>GA<br>AA | 0.98 (0.81-1.19)<br>P=0.84 | 0.69 | 1.12(1.12-1.19) <sup>3</sup>  | Per allele      | 0.11  |
| <i>TCF2 /<br/>HNF1B</i> | rs4430796  | AA<br>AG<br>GG | 1.04 (0.87-1.24)<br>P=0.65 | 0.47 | 1.10 (1.07-1.14) <sup>3</sup> | Per allele      | 0.095 |
| <i>TCF7L2</i>           | rs7901695  | GG<br>GT<br>TT | 1.25 (1.04-1.50)<br>P=0.02 | 0.18 | 1.37 (1.31-1.43) <sup>1</sup> | Per allele      | 0.315 |
| <i>THADA</i>            | rs7578597  | AA             | 0.99 (0.75-1.29)           | 0.90 | 1.15 (1.10-1.20) <sup>3</sup> | Per allele      | 0.14  |

|                         |           |                |                             |      |                               |            |       |
|-------------------------|-----------|----------------|-----------------------------|------|-------------------------------|------------|-------|
|                         |           | AG<br>GG       | P=0.91                      |      |                               |            |       |
| <i>TSPAN8/<br/>LGR5</i> | rs7961581 | AA<br>AG<br>GG | 0.94 (0.77-1.14)<br>P=0.54  | 0.27 | 1.09(1.06-1.12) <sup>†</sup>  | Per allele | 0.09  |
| <i>VEGFA</i>            | rs9472138 | GG<br>GA<br>AA | 0.996 (0.82-1.21)<br>P=0.96 | 0.28 | 1.06 (1.04-1.09) <sup>†</sup> | Per allele | 0.058 |

<sup>†</sup>from logistic regression adjusted for age and gender.

\*LD between rs8050136 and rs9930506 = 0.93

## References

- (1) Zeggini E, Scott LJ, Saxena R, Voight BF, Marchini JL, Hu T et al. Meta-analysis of genome-wide association data and large-scale replication identifies additional susceptibility loci for type 2 diabetes. *Nat Genet* 2008; 40:638-645.
- (2) Song Y, Niu T, Manson JE, Kwiatkowski DJ, Liu S. Are variants in the CAPN10 gene related to risk of type 2 diabetes? A quantitative assessment of population and family-based association studies. *Am J Hum Genet* 2004; 74:208-222.
- (3) Perry JR, Frayling TM. New gene variants alter type 2 diabetes risk predominantly through reduced beta-cell function. *Curr Opin Clin Nutr Metab Care* 2008; 11:371-377.
- (4) Zeggini E, Weedon MN, Lindgren CM, Frayling TM, Elliott KS, Lango H et al. Replication of Genome-Wide Association Signals in U.K. Samples Reveals Risk Loci for Type 2 Diabetes. *Science* 2007; 316:1336-1341.
- (5) Weedon MN, Owen KR, Shields B, Hitman G, Walker M, McCarthy MI et al. A large-scale association analysis of common variation of the HNF1alpha gene with type 2 diabetes in the U.K. Caucasian population. *Diab* 2005; 54:2487-2491.
