# Supplementary material
Source: PubMed Central journal article supplement (PMC4787580)
Supplement: talp672709.wt2_default.pdf [file talp672709.wt2_default.pdf]

**Web table B** Details of genotypes used in the analysis showing the risk alleles and the odds ratios for type 2 diabetes from phase 3 to phase 7, excluding 103 with type 2 diabetes at phase 3.

| Gene                      | Rs number   | Genotype       | Risk allele | N                   | No diabetic (%)                    | OR (95% CI) <sup>1</sup>                               | OR (95% CI) <sup>2</sup>   |
|---------------------------|-------------|----------------|-------------|---------------------|------------------------------------|--------------------------------------------------------|----------------------------|
| <i>ADAMTS9</i>            | rs4607103   | GG<br>GA<br>AA | G           | 2607<br>1677<br>275 | 155 (6.0)<br>102 (6.1)<br>19 (6.9) | 1.00<br>1.01 (0.78-1.31)<br>1.15 (0.70-1.88)<br>P=0.68 | 0.96 (0.79-1.18)<br>P=0.70 |
| <i>BCL11A</i>             | rs10490072  | AA<br>AG<br>GG | A           | 2464<br>1729<br>351 | 159 (6.5)<br>96 (5.6)<br>21 (6.0)  | 1.00<br>0.81 (0.62-1.06)<br>0.92 (0.58-1.48)<br>P=0.29 | 1.12 (0.92-1.37)<br>P=0.25 |
| <i>CAPN10</i>             | rs3792267   | GG<br>GA<br>AA | G           | 2669<br>1940<br>346 | 154 (5.8)<br>120 (6.2)<br>17 (4.9) | 1.00<br>1.15 (0.89-1.47)<br>0.89 (0.53-1.49)<br>P=0.44 | 0.97 (0.80-1.17)<br>P=0.72 |
| <i>CDC123,<br/>CAMK1D</i> | rs12779790  | AA<br>AG<br>GG | G           | 2957<br>1400<br>128 | 177 (6.0)<br>85 (6.1)<br>11 (8.6)  | 1.00<br>1.01 (0.77-1.32)<br>1.44 (0.76-2.73)<br>P=0.53 | 1.06 (0.85-1.33)<br>P=0.61 |
| <i>CDKALI</i>             | rs17036101  | GG<br>GA<br>AA | G           | 4040<br>497<br>20   | 247 (6.1)<br>28 (5.6)<br>1 (5.0)   | GG 1.00<br>A+ 0.93 (0.62-1.38)<br>P=0.72               | 1.08 (0.74-1.58)<br>P=0.68 |
| <i>CDKN2A/2B</i>          | rs10811661* | AA<br>AG<br>GG | A           | 3150<br>1298<br>116 | 205 (6.5)<br>63 (4.9)<br>8 (6.9)   | AA 1.00<br>G+ 0.76 (0.58-1.01)<br>P=0.06               | 1.22 (0.95-1.56)<br>P=0.13 |
| <i>FTO</i>                | rs1421085*  | TT             | C           | 1760                | 100 (5.7)                          | 1.00                                                   | 1.04 (0.88-1.23)           |

|                |            |                           |   |                      |                                    |                                                        |                            |
|----------------|------------|---------------------------|---|----------------------|------------------------------------|--------------------------------------------------------|----------------------------|
|                |            | TC<br>CC                  |   | 2461<br>860          | 152 (6.2)<br>50 (5.8)              | 1.11 (0.85-1.45)<br>1.05 (0.73-1.50)<br>P=0.73         | P=0.67                     |
| <i>HHEX</i>    | rs1111875* | GG<br>GA<br>AA            | G | 1606<br>2182<br>764  | 96 (6.0)<br>130 (6.0)<br>49 (6.4)  | 1.00<br>1.01 (0.77-1.33)<br>1.08 (0.76-1.54)<br>P=0.70 | 0.94 (0.79-1.13)<br>P=0.52 |
| <i>HNF1A</i>   | rs1800574  | CC<br>CT<br>TT            | T | 4629<br>276<br>5     | 269 (5.8)<br>18 (6.5)<br>1 (20.0)  | CC 1.00<br>T+1.29 (0.79-2.09)<br>P=0.31                | 1.34 (0.84-2.13)<br>P=0.22 |
| <i>IGF2BP2</i> | rs4402960  | CC<br>AC<br>AA            | A | 2155<br>1960<br>442  | 109 (5.1)<br>140 (7.1)<br>26 (5.9) | 1.00<br>1.44 (1.11-1.87)<br>1.19 (0.76-1.85)<br>P=0.05 | 1.16 (0.97-1.40)<br>P=0.11 |
| <i>JAZF1</i>   | rs864745   | AA<br>AG<br>GG            | A | 1137<br>2240<br>1176 | 81 (7.1)<br>139 (6.2)<br>56 (4.8)  | 1.00<br>0.85 (0.64-1.13)<br>0.63 (0.44-0.90)<br>P=0.01 | 1.23 (1.03-1.46)<br>P=0.02 |
| <i>KCNJ11</i>  | rs5219*    | CC<br>CT<br>TT            | T | 1978<br>2110<br>612  | 114 (5.5)<br>134 (6.0)<br>49 (7.4) | 1.00<br>1.11 (0.85-1.44)<br>1.47 (1.03-2.08)<br>p=0.05 | 1.19 (1.00-1.41)<br>P=0.05 |
| <i>NOTCH2</i>  | rs10923931 | CC<br>AC<br>AA<br>P value | A | 3643<br>861<br>58    | 212 (5.8)<br>62 (7.2)<br>2 (3.5)   | CC 1.00<br>A+ 1.19 (0.89-1.59)<br>P=0.24               | 1.14 (0.87-1.49)<br>P=0.34 |
| <i>PPAR G</i>  | rs1801282  | CC<br>CG                  | C | 3881<br>1038         | 221 (5.7)<br>70 (6.7)              | CG+GG vs. CC<br>1.00                                   | 0.90 (0.70-1.15)<br>P=0.39 |

|                                 |             |                |   |                      |                                    |                                                         |                             |
|---------------------------------|-------------|----------------|---|----------------------|------------------------------------|---------------------------------------------------------|-----------------------------|
|                                 |             | GG<br>P value  |   | 79                   | 3 (3.8)                            | 1.19 (0.90-1.57)<br>P=0.21                              |                             |
| <i>SLC30A8</i>                  | rs13266634* | GG<br>GA<br>AA | G | 2190<br>1967<br>391  | 131 (6.0)<br>117 (6.0)<br>25 (6.4) | 1.00<br>0.98 (0.76-1.27)<br>1.05 (0.67-1.64)<br>P=0.93  | 0.98 (0.81-1.19)<br>P=0.84  |
| <i>TCF2</i><br>( <i>HNF1B</i> ) | rs4430796*  | AA<br>AG<br>GG | G | 1268<br>2214<br>1041 | 78 (6.2)<br>125 (5.7)<br>71 (6.8)  | 1.00<br>0.91 (0.68-1.22)<br>1.09 (0.78-1.52)<br>P=0.66  | 1.04 (0.87-1.24)<br>P=0.65  |
| <i>TCF7L2</i>                   | rs7901695   | AA<br>AG<br>GG | G | 2157<br>1943<br>433  | 116 (5.4)<br>121 (6.2)<br>37 (8.6) | 1.00<br>1.17 (0.89-1.52)<br>1.65 (1.11-2.44)<br>P=0.051 | 1.25 (1.04-1.50)<br>P=0.02  |
| <i>THADA</i>                    | rs7578597   | AA<br>AG<br>GG | A | 3592<br>898<br>69    | 217 (6.0)<br>56 (6.2)<br>3 (4.4)   | AA 1.00<br>G+ 1.01 (0.75-1.36)<br>P=0.94                | 0.99 (0.75-1.29)<br>P=0.91  |
| <i>TSPAN8,</i><br><i>LGR5</i>   | rs7961581   | AA<br>AG<br>GG | G | 2376<br>1792<br>368  | 149 (6.3)<br>103 (5.8)<br>22 (6.0) | 1.00<br>0.92 (0.71-1.19)<br>0.97 (0.61-1.55)<br>P=0.66  | 0.94 (0.77-1.14)<br>P=0.54  |
| <i>VEGFA</i>                    | rs9472138   | GG<br>GA<br>AA | A | 2369<br>1813<br>364  | 140 (5.9)<br>117 (6.5)<br>17 (4.7) | 1.00<br>1.12 (0.87-1.45)<br>0.80 (0.48-1.35)<br>P=0.37  | 0.996 (0.82-1.21)<br>P=0.96 |

<sup>1</sup>odds ratio from logistic regression adjusted for age and gender.

<sup>2</sup>odds ratio for additive effect (number of risk alleles held) adjusted for age and gender.
