# Supplementary material
Source: PubMed Central journal article supplement (PMC4787580)
Supplement: talp672709.wt3_default.pdf [file talp672709.wt3_default.pdf]

**Web table C** Characteristics of Whitehall II participants at Phase 3 excluding those with prevalent type 2 diabetes (n=103). Values are means (SD) unless specified otherwise.

| Phase 3 variable                      | Non diabetic<br>N=4833 | Diabetic<br>N=302 | P -value |
|---------------------------------------|------------------------|-------------------|----------|
| Age yrs                               | 49.0 (5.9)             | 51.0 (6.3)        | <0.0001  |
| Gender (% male)                       | 72.8 (3516)            | 72.9 (220)        | 0.97     |
| Cholesterol (mmol/l)                  | 6.43 (1.14)            | 6.66 (1.08)       | 0.001    |
| Triglyceride(mmol/l) *                | 1.19 (0.64)            | 1.77 (0.94)       | <0.0001  |
| LDL (mmol/l)                          | 4.36 (1.02)            | 4.47 (0.95)       | 0.07     |
| HDL (mmol/l)*                         | 1.39 (0.39)            | 1.21 (0.34)       | <0.0001  |
| SBP (mmHg)*                           | 119.0 (12.9)           | 125.7 (14.2)      | <0.0001  |
| DBP (mmHg)                            | 79.2 (9.2)             | 82.8 (9.6)        | <0.0001  |
| Body Mass Index (kg/m <sup>2</sup> )* | 24.7 (3.2)             | 27.5 (4.7)        | <0.0001  |
| CRP (mg/l)*                           | 0.80 (0.93)            | 1.61 (1.82)       | <0.0001  |
| Fibrinogen (g/l)*                     | 2.30 (0.51)            | 2.49 (0.57)       | <0.0001  |
| Fasting glucose (mmol/l)**            | 5.2 [4.9-5.4]          | 5.5 [5.2-6]       | <0.0001  |
| Smoking (%; n) Never                  | 51.4 (2334)            | 45.3 (126)        | 0.008    |
| Ex                                    | 37.0 (1680)            | 37.1 (103)        |          |
| Current                               | 11.7 (530)             | 17.6 (49)         |          |

\*geometric mean (approximate standard deviation)

\*\*median [interquartile range]
