# Supplementary material
Source: PubMed Central journal article supplement (PMC4787580)
Supplement: talp672709.wt4_default.pdf [file talp672709.wt4_default.pdf]

**Web table D** Association of genotypes with total cholesterol (mmol/l) (phase 3 and phase 7)

| Gene                      | Genotype             | Number | Phase 3     | Phase 7     | Beta-value (standard error) all years combined |
|---------------------------|----------------------|--------|-------------|-------------|------------------------------------------------|
| <i>ADAMTS9</i>            | GG                   | 2878   | 6.46 (1.13) | 5.77 (1.03) | 0                                              |
|                           | GA                   | 1857   | 6.43 (1.12) | 5.71 (1.00) | -0.045 (0.026)                                 |
|                           | AA                   | 297    | 6.40 (1.14) | 5.61 (1.09) | -0.118 (0.054)                                 |
|                           | P value <sup>1</sup> |        | 0.51        | 0.009       |                                                |
|                           | P value <sup>2</sup> |        | 0.37        | 0.007       | 0.01                                           |
| <i>BCL11A</i>             | AA                   | 2728   | 6.45 (1.12) | 5.74 (1.02) | 0                                              |
|                           | AG                   | 1909   | 6.45 (1.14) | 5.73 (1.02) | -0.020 (0.026)                                 |
|                           | GG                   | 380    | 6.39 (1.10) | 5.78 (1.04) | -0.003 (0.048)                                 |
|                           | P value <sup>1</sup> |        | 0.70        | 0.66        |                                                |
|                           | P value <sup>2</sup> |        | 0.63        | 0.60        | 0.63                                           |
| <i>CALPN10</i>            | GG                   | 2945   | 6.47 (1.13) | 5.76 (1.03) | 0                                              |
|                           | GA                   | 2150   | 6.46 (1.15) | 5.75 (1.01) | -0.003 (0.025)                                 |
|                           | AA                   | 378    | 6.33 (1.10) | 5.61 (0.98) | -0.118 (0.048)                                 |
|                           | P value <sup>1</sup> |        | 0.11        | 0.03        |                                                |
|                           | P value <sup>2</sup> |        | 0.11        | 0.12        | 0.01*                                          |
| <i>CDC123,<br/>CAMK1D</i> | AA                   | 3464   | 6.44 (1.11) | 5.74 (1.00) | 0                                              |
|                           | AG                   | 1448   | 6.46 (1.18) | 5.75 (1.07) | 0.009 (0.027)                                  |
|                           | GG                   | 124    | 6.35 (1.14) | 5.69 (1.11) | -0.112 (0.080)                                 |
|                           | P value <sup>1</sup> |        | 0.61        | 0.73        |                                                |
|                           | P value <sup>2</sup> |        | 0.71        | 0.68        | 0.65                                           |
| <i>CDKALI</i>             | GG                   | 4463   | 6.43 (1.12) | 5.73 (1.02) | 0                                              |
|                           | GA                   | 543    | 6.58 (1.14) | 5.83 (1.03) | 0.095 (0.040)                                  |
|                           | AA                   | 24     | 6.52 (1.38) | 5.42 (1.02) | -0.117 (0.180)                                 |
|                           | P value <sup>1</sup> |        | 0.02        | 0.03        |                                                |
|                           | P value <sup>2</sup> |        | 0.01        | 0.03        | 0.05                                           |
| <i>CDKN</i>               | AA                   | 3257   | 6.42 (1.12) | 5.73 (1.02) | 0                                              |

|                |                                                                |                      |                                                           |                                                           |                                                    |
|----------------|----------------------------------------------------------------|----------------------|-----------------------------------------------------------|-----------------------------------------------------------|----------------------------------------------------|
|                | AG<br>GG<br>P value <sup>1</sup><br>P value <sup>2</sup>       | 1543<br>149          | 6.49 (1.12)<br>6.55 (1.19)<br>0.06<br>0.10                | 5.77 (1.02)<br>5.65 (1.14)<br>0.20<br>0.17                | 0.067 (0.027)<br>0.016 (0.074)<br><br>0.04         |
| <i>FTO</i>     | TT<br>TC<br>CC<br>P value <sup>1</sup><br>P value <sup>2</sup> | 1953<br>2716<br>938  | 6.47 (1.17)<br>6.43 (1.11)<br>6.48 (1.12)<br>0.35<br>0.38 | 5.74 (1.03)<br>5.76 (1.01)<br>5.73 (1.05)<br>0.71<br>0.63 | 0<br>-0.000 (0.026)<br>0.019 (0.035)<br><br>0.65   |
| <i>HHEX</i>    | GG<br>GA<br>AA<br>P value <sup>1</sup><br>P value <sup>2</sup> | 2635<br>1968<br>405  | 6.44 (1.15)<br>6.45 (1.11)<br>6.45 (1.10)<br>0.93<br>0.91 | 5.76 (1.04)<br>5.71 (1.02)<br>5.71 (0.93)<br>0.22<br>0.30 | 0<br>-0.027 (0.026)<br>-0.039 (0.047)<br><br>0.24  |
| <i>HNF1A</i>   | CC<br>CT<br>TT<br>P value <sup>1</sup><br>P value <sup>2</sup> | 5106<br>301<br>5     | 6.45 (1.13)<br>6.42 (1.14)<br>6.95 (0.76)<br>0.60<br>0.52 | 5.75 (1.02)<br>5.65 (1.05)<br>6.54 (0.95)<br>0.05<br>0.06 | 0<br>-0.064 (0.052)<br>0.758 (0.399)<br><br>0.06*  |
| <i>IGF2BP2</i> | CC<br>AC<br>AA<br>P value <sup>1</sup><br>P value <sup>2</sup> | 2362<br>2182<br>485  | 6.46 (1.15)<br>6.43 (1.11)<br>6.43 (1.09)<br>0.67<br>0.63 | 5.76 (1.04)<br>5.72 (1.01)<br>5.70 (0.98)<br>0.26<br>0.21 | 0<br>-0.037 (0.026)<br>-0.023 (0.044)<br><br>0.26  |
| <i>JAZF1</i>   | AA<br>AG<br>GG<br>P value <sup>1</sup><br>P value <sup>2</sup> | 1269<br>2453<br>1304 | 6.51 (1.16)<br>6.42 (1.10)<br>6.42 (1.13)<br>0.09<br>0.05 | 5.79 (1.06)<br>5.75 (1.00)<br>5.68 (1.03)<br>0.02<br>0.04 | 0<br>-0.047 (0.030)<br>-0.098 (0.035)<br><br>0.005 |

|                                 |                      |      |             |             |                |
|---------------------------------|----------------------|------|-------------|-------------|----------------|
| <i>KCNJ11</i>                   | CC                   | 2313 | 6.45 (1.13) | 5.72 (1.02) | 0              |
|                                 | CT                   | 2478 | 6.46 (1.13) | 5.77 (1.04) | 0.036 (0.025)  |
|                                 | TT                   | 720  | 6.44 (1.18) | 5.72 (0.95) | 0.004 (0.038)  |
|                                 | P value <sup>1</sup> |      | 0.93        | 0.12        |                |
|                                 | P value <sup>2</sup> |      | P=0.88      | P=0.17      | P=0.51         |
| <i>NOTCH2</i>                   | CC                   | 4024 | 6.43 (1.12) | 5.74 (1.02) | 0              |
|                                 | AC                   | 949  | 6.52 (1.13) | 5.76 (1.02) | 0.059 (0.032)  |
|                                 | AA                   | 62   | 6.23 (1.20) | 5.58 (1.01) | -0.190 (0.113) |
|                                 | P value <sup>1</sup> |      | 0.04        | 0.37        |                |
|                                 | P value <sup>2</sup> |      | 0.03        | 0.30        | 0.39           |
| <i>PPARG</i>                    | CC                   | 4290 | 6.44 (1.15) | 5.74 (1.03) | 0              |
|                                 | CG                   | 1138 | 6.50 (1.07) | 5.78 (1.00) | 0.039 (0.029)  |
|                                 | GG                   | 86   | 6.59 (1.31) | 5.70 (1.06) | 0.010 (0.096)  |
|                                 | P value <sup>1</sup> |      | P=0.17      | 0.47        |                |
|                                 | P value <sup>2</sup> |      | P=0.17      | 0.55        | 0.24           |
| <i>SLC30A8</i>                  | GG                   | 2416 | 6.43 (1.11) | 5.77 (1.02) | 0              |
|                                 | GA                   | 2177 | 6.46 (1.15) | 5.71 (1.01) | -0.016 (0.026) |
|                                 | AA                   | 428  | 6.42 (1.10) | 5.71 (1.09) | -0.022 (0.046) |
|                                 | P value <sup>1</sup> |      | 0.55        | 0.18        |                |
|                                 | P value <sup>2</sup> |      | 0.58        | 0.23        | 0.49           |
| <i>TCF2</i><br>( <i>HNF1B</i> ) | AA                   | 1395 | 6.35 (1.06) | 5.72 (1.00) | 0              |
|                                 | AG                   | 2446 | 6.48 (1.15) | 5.74 (1.03) | 0.067 (0.030)  |
|                                 | GG                   | 1154 | 6.47 (1.15) | 5.75 (1.03) | 0.058 (0.035)  |
|                                 | P value <sup>1</sup> |      | 0.002       | 0.63        |                |
|                                 | P value <sup>2</sup> |      | 0.003       | 0.60        | 0.08           |
| <i>TCF7L2</i>                   | AA                   | 2365 | 6.42 (1.14) | 5.75 (1.02) | 0              |
|                                 | AG                   | 2173 | 6.45 (1.13) | 5.72 (1.04) | -0.000 (0.026) |
|                                 | GG                   | 467  | 6.47 (1.06) | 5.74 (0.97) | 0.011 (0.045)  |
|                                 | P value <sup>1</sup> |      | 0.60        | 0.66        |                |
|                                 |                      |      |             |             |                |

|                               | P value <sup>2</sup> |      | 0.62        | 0.68        | 0.87           |
|-------------------------------|----------------------|------|-------------|-------------|----------------|
| <i>THADA</i>                  | AA                   | 3953 | 6.44 (1.14) | 5.73 (1.03) | 0              |
|                               | AG                   | 1003 | 6.46 (1.09) | 5.79 (0.99) | 0.054 (0.031)  |
|                               | GG                   | 75   | 6.38 (1.16) | 5.64 (0.97) | -0.144 (0.103) |
|                               | P value <sup>1</sup> |      | 0.81        | 0.19        |                |
|                               | P value <sup>2</sup> |      | 0.63        | 0.16        | 0.42           |
| <i>TSPAN8,</i><br><i>LGR5</i> | AA                   | 1762 | 6.42 (1.12) | 5.70 (1.04) | 0              |
|                               | AG                   | 2424 | 6.47 (1.14) | 5.77 (1.02) | 0.053 (0.028)  |
|                               | GG                   | 838  | 6.43 (1.12) | 5.74 (1.01) | 0.024 (0.037)  |
|                               | P value <sup>1</sup> |      | 0.41        | 0.12        |                |
|                               | P value <sup>2</sup> |      | 0.30        | 0.08        | 0.28           |
| <i>VEGFA</i>                  | GG                   | 2611 | 6.45 (1.12) | 5.74 (1.02) | 0              |
|                               | GA                   | 2008 | 6.43 (1.12) | 5.73 (1.01) | -0.018 (0.026) |
|                               | AA                   | 400  | 6.53 (1.23) | 5.83 (1.10) | 0.106 (0.047)  |
|                               | P value <sup>1</sup> |      | 0.28        | 0.17        |                |
|                               | P value <sup>2</sup> |      | 0.19        | 0.15        | 0.26           |

Results are mean (standard deviation)

<sup>1</sup> ANOVA, unadjusted

<sup>2</sup> ANOVA, adjusted for age and gender.

\*recessive model

B(se) is the coefficient for overall genotype effect estimated from a mixed model with age at phase1 and gender included as fixed covariates.

The change in cholesterol over time is allowed to vary between subjects.
