# Supplementary material
Source: PubMed Central journal article supplement (PMC4787580)
Supplement: talp672709.wt5_default.pdf [file talp672709.wt5_default.pdf]

**Web table E** Association of genotypes with low density lipoprotein-cholesterol (mmol/l) (phase 3 and phase 7)

| <i>Gene</i>               | Genotype             | Number | Phase 3     | Phase 7     | Beta-value<br>(standard error) all<br>years combined |
|---------------------------|----------------------|--------|-------------|-------------|------------------------------------------------------|
| <i>ADAMTS9</i>            | GG                   | 2878   | 4.37 (1.01) | 3.55 (0.93) | 0                                                    |
|                           | GA                   | 1857   | 4.36 (1.02) | 3.50 (0.94) | -0.040 (0.025)                                       |
|                           | AA                   | 297    | 4.34 (1.03) | 3.44 (0.98) | -0.108 (0.050)                                       |
|                           | P value <sup>1</sup> |        | 0.85        | 0.04        |                                                      |
|                           | P value <sup>2</sup> |        | 0.68        | 0.05        | 0.03                                                 |
| <i>BCL11A</i>             | AA                   | 2728   | 4.37 (1.01) | 3.53 (0.94) | 0                                                    |
|                           | AG                   | 1909   | 4.35 (1.02) | 3.51 (0.94) | -0.017 (0.025)                                       |
|                           | GG                   | 380    | 4.36 (1.02) | 3.55 (0.96) | -0.001 (0.045)                                       |
|                           | P value <sup>1</sup> |        | 0.82        | 0.76        |                                                      |
|                           | P value <sup>2</sup> |        | 0.78        | 0.78        | 0.67                                                 |
| <i>CALPN10</i>            | GG                   | 2945   | 4.38 (1.00) | 3.55 (0.94) | 0                                                    |
|                           | GA                   | 2150   | 4.37 (1.04) | 3.53 (0.93) | -0.005 (0.023)                                       |
|                           | AA                   | 378    | 4.24 (0.99) | 3.40 (0.88) | -0.118 (0.045)                                       |
|                           | P value <sup>1</sup> |        | 0.06        | 0.02        |                                                      |
|                           | P value <sup>2</sup> |        | 0.08        | 0.01        | 0.01*                                                |
| <i>CDC123,<br/>CAMK1D</i> | AA                   | 3464   | 4.36 (1.00) | 3.52 (0.91) | 0                                                    |
|                           | AG                   | 1448   | 4.38 (1.05) | 3.54 (0.99) | 0.008 (0.026)                                        |
|                           | GG                   | 124    | 4.26 (1.01) | 3.48 (0.98) | -0.090 (0.076)                                       |
|                           | P value <sup>1</sup> |        | 0.50        | 0.73        |                                                      |
|                           | P value <sup>2</sup> |        | 0.62        | 0.71        | 0.28                                                 |
| <i>CDKALI</i>             | GG                   | 4463   | 4.35 (1.01) | 3.52 (0.94) | 0                                                    |
|                           | GA                   | 543    | 4.50 (1.02) | 3.62 (0.95) | 0.091 (0.037)                                        |
|                           | AA                   | 24     | 4.33 (1.16) | 3.22 (0.93) | -0.192 (0.170)                                       |
|                           | P value <sup>1</sup> |        | 0.008       | 0.01        |                                                      |
|                           | P value <sup>2</sup> |        | 0.004       | 0.02        | 0.08                                                 |
| <i>CDKN</i>               | AA                   | 3257   | 4.34 (1.01) | 3.52 (0.94) | 0                                                    |
|                           | AG                   | 1543   | 4.41 (1.01) | 3.55 (0.93) | 0.054 (0.026)                                        |
|                           | GG                   | 149    | 4.45 (1.03) | 3.42 (1.00) | -0.031 (0.069)                                       |
|                           | P value <sup>1</sup> |        | 0.04        | 0.18        |                                                      |
|                           | P value <sup>2</sup> |        | 0.07        | 0.18        | 0.87                                                 |
| <i>FTO</i>                | TT                   | 1953   | 4.37 (1.04) | 3.52 (0.95) | 0                                                    |
|                           | TC                   | 2716   | 4.35 (0.99) | 3.54 (0.92) | -0.018 (0.025)                                       |
|                           | CC                   | 938    | 4.40 (1.01) | 3.52 (0.95) | 0.001 (0.033)                                        |
|                           | P value <sup>1</sup> |        | 0.49        | 0.83        |                                                      |
|                           | P value <sup>2</sup> |        | 0.51        | 0.81        | 0.85                                                 |
| <i>HHEX</i>               | GG                   | 2635   | 4.35 (1.03) | 3.55 (0.96) | 0                                                    |
|                           | GA                   | 1968   | 4.38 (1.01) | 3.50 (0.93) | -0.016 (0.025)                                       |
|                           | AA                   | 405    | 4.37 (0.98) | 3.51 (0.84) | -0.019 (0.044)                                       |
|                           | P value <sup>1</sup> |        | 0.68        | 0.26        |                                                      |
|                           | P value <sup>2</sup> |        | 0.73        | 0.26        | 0.71                                                 |

|                                 |                      |      |             |             |                |
|---------------------------------|----------------------|------|-------------|-------------|----------------|
| <i>HNF1A</i>                    | CC                   | 5106 | 4.36 (1.01) | 3.54 (0.94) | 0              |
|                                 | CT                   | 301  | 4.34 (1.06) | 3.44 (0.94) | -0.065 (0.049) |
|                                 | TT                   | 5    | 4.79 (0.57) | 4.36 (0.84) | 0.756 (0.380)  |
|                                 | P value <sup>1</sup> |      | 0.64        | 0.03        |                |
|                                 | P value <sup>2</sup> |      | 0.50        | 0.03        | 0.05*          |
| <i>IGF2BP2</i>                  | CC                   | 2362 | 4.39 (1.04) | 3.57 (0.96) | 0              |
|                                 | AC                   | 2182 | 4.34 (0.99) | 3.49 (0.91) | -0.069 (0.025) |
|                                 | AA                   | 485  | 4.38 (0.98) | 3.49 (0.92) | -0.032 (0.041) |
|                                 | P value <sup>1</sup> |      | 0.23        | 0.02        |                |
|                                 | P value <sup>2</sup> |      | 0.15        | 0.02        | 0.70           |
| <i>JAZF1</i>                    | AA                   | 1269 | 4.41 (1.06) | 3.55 (0.98) | 0              |
|                                 | AG                   | 2453 | 4.35 (0.99) | 3.54 (0.91) | -0.032 (0.029) |
|                                 | GG                   | 1304 | 4.35 (1.01) | 3.48 (0.95) | -0.068 (0.033) |
|                                 | P value <sup>1</sup> |      | 0.26        | 0.09        |                |
|                                 | P value <sup>2</sup> |      | 0.13        | 0.11        | 0.07           |
| <i>KCNJ11</i>                   | CC                   | 2313 | 4.36 (1.02) | 3.51 (0.93) | 0              |
|                                 | CT                   | 2478 | 4.37 (1.01) | 3.56 (0.95) | 0.045 (0.024)  |
|                                 | TT                   | 720  | 4.35 (1.05) | 3.52 (0.91) | 0.004 (0.036)  |
|                                 | P value <sup>1</sup> |      | 0.88        | 0.14        |                |
|                                 | P value <sup>2</sup> |      | P=0.76      | P=0.15      | P=0.39         |
| <i>NOTCH2</i>                   | CC                   | 4024 | 4.35 (1.01) | 3.52 (0.94) | 0              |
|                                 | AC                   | 949  | 4.43 (1.03) | 3.55 (0.93) | 0.053 (0.030)  |
|                                 | AA                   | 62   | 4.13 (0.93) | 3.39 (0.90) | -0.194 (0.106) |
|                                 | P value <sup>1</sup> |      | 0.04        | 0.33        |                |
|                                 | P value <sup>2</sup> |      | 0.04        | 0.34        | 0.21           |
| <i>PPARG</i>                    | CC                   | 4290 | 4.35 (1.02) | 3.52 (0.94) | 0              |
|                                 | CG                   | 1138 | 4.41 (0.97) | 3.56 (0.93) | 0.029 (0.028)  |
|                                 | GG                   | 86   | 4.50 (1.14) | 3.48 (0.96) | 0.019 (0.090)  |
|                                 | P value <sup>1</sup> |      | 0.11        | 0.48        |                |
|                                 | P value <sup>2</sup> |      | 0.09        | 0.53        | 0.33           |
| <i>SLC30A8</i>                  | GG                   | 2416 | 4.35 (0.99) | 3.55 (0.94) | 0              |
|                                 | GA                   | 2177 | 4.38 (1.04) | 3.51 (0.93) | -0.009 (0.024) |
|                                 | AA                   | 428  | 4.34 (0.99) | 3.49 (0.97) | -0.048 (0.043) |
|                                 | P value <sup>1</sup> |      | 0.52        | 0.30        |                |
|                                 | P value <sup>2</sup> |      | 0.48        | 0.34        | 0.28           |
| <i>TCF2</i><br>( <i>HNF1B</i> ) | AA                   | 1395 | 4.28 (0.96) | 3.51 (0.92) | 0              |
|                                 | AG                   | 2446 | 4.39 (1.03) | 3.53 (0.94) | 0.071 (0.028)  |
|                                 | GG                   | 1154 | 4.39 (1.04) | 3.53 (0.95) | 0.063 (0.033)  |
|                                 | P value <sup>1</sup> |      | 0.004       | 0.65        |                |
|                                 | P value <sup>2</sup> |      | 0.005       | 0.63        | 0.38           |
| <i>TCF7L2</i>                   | AA                   | 2365 | 4.34 (1.03) | 3.54 (0.93) | 0              |
|                                 | AG                   | 2173 | 4.38 (1.01) | 3.52 (0.95) | 0.004 (0.025)  |
|                                 | GG                   | 467  | 4.37 (0.97) | 3.49 (0.89) | -0.016 (0.042) |
|                                 | P value <sup>1</sup> |      | 0.45        | 0.60        |                |
|                                 | P value <sup>2</sup> |      | 0.45        | 0.60        | 0.86           |
| <i>THADA</i>                    | AA                   | 3953 | 4.35 (1.02) | 3.51 (0.95) | 0              |

|                               |                      |      |             |              |                |
|-------------------------------|----------------------|------|-------------|--------------|----------------|
|                               | AG                   | 1003 | 4.40 (0.99) | 3.58 (0.89)  | 0.059 (0.029)  |
|                               | GG                   | 75   | 4.34 (1.06) | 3.46 (0.87)  | -0.087 (0.097) |
|                               | P value <sup>1</sup> |      | 0.42        | 0.10         |                |
|                               | P value <sup>2</sup> |      | 0.32        | 0.12         | 0.70           |
| <i>TSPAN8,</i><br><i>LGR5</i> | AA                   | 1762 | 4.36 (1.01) | 3.50 (0.95)  | 0              |
|                               | AG                   | 2424 | 4.38 (1.02) | 3.55 (0.94)  | 0.029 (0.026)  |
|                               | GG                   | 838  | 4.34 (1.00) | 3.52 (0.90)  | 0.011 (0.035)  |
|                               | P value <sup>1</sup> |      | 0.70        | 0.30         |                |
|                               | P value <sup>2</sup> |      | 0.64        | 0.31         | 0.97           |
| <i>VEGFA</i>                  | GG                   | 2611 | 4.37 (1.02) | 3.52 (0.94)  | 0              |
|                               | GA                   | 2008 | 4.35 (0.99) | 3..52 (0.92) | -0.000 (0.025) |
|                               | AA                   | 400  | 4.44 (1.09) | 3.63 (1.01)  | 0.106 (0.044)  |
|                               | P value <sup>1</sup> |      | 0.33        | 0.06         |                |
|                               | P value <sup>2</sup> |      | 0.23        | 0.06         | 0.10           |

Results are mean (SD)

<sup>1</sup> ANOVA, unadjusted

<sup>2</sup> ANOVA, adjusted for age and gender.

\*recessive model

B(se) is the coefficient for overall genotype effect estimated from a mixed model with age at phase1 and gender included as fixed covariates. The change in cholesterol over time is allowed to vary between subjects.
