# Supplementary material
Source: PubMed Central journal article supplement (PMC4787580)
Supplement: talp672709.wt6_default.pdf [file talp672709.wt6_default.pdf]

**Web table F** Association of genotypes with triglyceride levels (mmol/l) (phase 3 and phase 7)

| Gene                      | Genotype             | Number | Phase 3     | Phase 7     | Beta-value<br>(standard error) all<br>years combined |
|---------------------------|----------------------|--------|-------------|-------------|------------------------------------------------------|
| <i>ADAMTS9</i>            | GG                   | 2878   | 1.22 (0.68) | 1.23 (0.64) | 0                                                    |
|                           | GA                   | 1857   | 1.22 (0.66) | 1.19 (0.59) | -0.013 (0.014)                                       |
|                           | AA                   | 297    | 1.19 (0.61) | 1.20 (0.55) | -0.022 (0.028)                                       |
|                           | P value <sup>1</sup> |        | 0.66        | 0.19        |                                                      |
|                           | P value <sup>2</sup> |        | 0.60        | 0.17        | 0.45                                                 |
| <i>BCL11A</i>             | AA                   | 2728   | 1.23 (0.68) | 1.23 (0.62) | 0                                                    |
|                           | AG                   | 1909   | 1.21 (0.66) | 1.19 (0.60) | -0.021 (0.014)                                       |
|                           | GG                   | 380    | 1.20 (0.63) | 1.23 (0.67) | -0.010 (0.025)                                       |
|                           | P value <sup>1</sup> |        | 0.55        | 0.17        |                                                      |
|                           | P value <sup>2</sup> |        | 0.57        | 0.22        | 0.23                                                 |
| <i>CALPN10</i>            | GG                   | 2945   | 1.24 (0.70) | 1.22 (0.62) | 0                                                    |
|                           | GA                   | 2150   | 1.22 (0.67) | 1.22 (0.63) | -0.002 (0.013)                                       |
|                           | AA                   | 378    | 1.18 (0.60) | 1.18 (0.60) | -0.029 (0.026)                                       |
|                           | P value <sup>1</sup> |        | 0.22        | 0.61        |                                                      |
|                           | P value <sup>2</sup> |        | 0.39        | 0.70        | 0.27*                                                |
| <i>CDC123,<br/>CAMK1D</i> | AA                   | 3464   | 1.21 (0.66) | 1.20 (0.61) | 0                                                    |
|                           | AG                   | 1448   | 1.24 (0.70) | 1.24 (0.63) | 0.027 (0.015)                                        |
|                           | GG                   | 124    | 1.12 (0.57) | 1.11 (0.58) | -0.069 (0.043)                                       |
|                           | P value <sup>1</sup> |        | 0.09        | 0.03        |                                                      |
|                           | P value <sup>2</sup> |        | 0.12        | 0.03        | 0.20                                                 |
| <i>CDKALI</i>             | GG                   | 4463   | 1.22 (0.67) | 1.21 (0.62) | 0                                                    |
|                           | GA                   | 543    | 1.22 (0.68) | 1.22 (0.62) | 0.003 (0.021)                                        |
|                           | AA                   | 24     | 1.22 (0.64) | 1.31 (0.49) | 0.042 (0.095)                                        |
|                           | P value <sup>1</sup> |        | 0.997       | 0.71        |                                                      |
|                           | P value <sup>2</sup> |        | 0.98        | 0.70        | 0.78                                                 |
| <i>CDKN</i>               | AA                   | 3257   | 1.22 (0.66) | 1.20 (0.62) | 0                                                    |
|                           | AG                   | 1543   | 1.22 (0.68) | 1.23 (0.61) | 0.014 (0.014)                                        |
|                           | GG                   | 149    | 1.23 (0.72) | 1.19 (0.61) | 0.011 (0.039)                                        |
|                           | P value <sup>1</sup> |        | 0.97        | 0.36        |                                                      |
|                           | P value <sup>2</sup> |        | 0.97        | 0.37        | 0.70                                                 |
| <i>FTO</i>                | TT                   | 1953   | 1.22 (0.68) | 1.22 (0.62) | 0                                                    |
|                           | TC                   | 2716   | 1.20 (0.66) | 1.20 (0.61) | -0.018 (0.014)                                       |
|                           | CC                   | 938    | 1.27 (0.70) | 1.23 (0.63) | 0.016 (0.018)                                        |
|                           | P value <sup>1</sup> |        | 0.05        | 0.24        |                                                      |
|                           | P value <sup>2</sup> |        | 0.05        | 0.21        | 0.73                                                 |
| <i>HHEX</i>               | GG                   | 2635   | 1.22 (0.67) | 1.22 (0.61) | 0                                                    |
|                           | GA                   | 1968   | 1.23 (0.67) | 1.20 (0.62) | -0.016 (0.014)                                       |
|                           | AA                   | 405    | 1.19 (0.66) | 1.20 (0.63) | -0.025 (0.025)                                       |
|                           | P value <sup>1</sup> |        | 0.62        | 0.58        |                                                      |
|                           | P value <sup>2</sup> |        | 0.69        | 0.47        | 0.35                                                 |

|                                 |                      |      |              |             |                |
|---------------------------------|----------------------|------|--------------|-------------|----------------|
| <i>HNF1A</i>                    | CC                   | 5106 | 1.23 (0.68)  | 1.22 (0.62) | 0              |
|                                 | CT                   | 301  | 1.20 (0.60)  | 1.18 (0.58) | -0.023 (0.028) |
|                                 | TT                   | 5    | 1.86 (0.54)  | 1.55 (0.23) | 0.340 (0.213)  |
|                                 | P value <sup>1</sup> |      | 0.27         | 0.36        |                |
|                                 | P value <sup>2</sup> |      | 0.15         | 0.32        | 0.11*          |
| <i>IGF2BP2</i>                  | CC                   | 2362 | 1.21 (0.66)  | 1.20 (0.60) | 0              |
|                                 | AC                   | 2182 | 1.24 (0.70)  | 1.23 (0.65) | 0.027 (0.014)  |
|                                 | AA                   | 485  | 1.17 (0.61)  | 1.16 (0.54) | -0.023 (0.023) |
|                                 | P value <sup>1</sup> |      | 0.04         | 0.03        |                |
|                                 | P value <sup>2</sup> |      | 0.06         | 0.04        | 0.20           |
| <i>JAZF1</i>                    | AA                   | 1269 | 1.23 (0.70)  | 1.22 (0.63) | 0              |
|                                 | AG                   | 2453 | 1.21 (0.66)  | 1.21 (0.62) | -0.001 (0.016) |
|                                 | GG                   | 1304 | 1.23 (0.65)  | 1.22 (0.60) | 0.004 (0.018)  |
|                                 | P value <sup>1</sup> |      | 0.57         | 0.73        |                |
|                                 | P value <sup>2</sup> |      | 0.47         | 0.74        | 0.74           |
| <i>KCNJ11</i>                   | CC                   | 2313 | 1.23 (0.67)  | 1.21 (0.61) | 0              |
|                                 | CT                   | 2478 | 1.22 (0.67)  | 1.22 (0.63) | 0.009 (0.013)  |
|                                 | TT                   | 720  | 1.24 (0.72)  | 1.20 (0.61) | 0.004 (0.020)  |
|                                 | P value <sup>1</sup> |      | 0.76         | 0.70        |                |
|                                 | P value <sup>2</sup> |      | 0.93         | 0.61        | 0.65           |
| <i>NOTCH2</i>                   | CC                   | 4024 | 1.21 (0.67)  | 1.21 (0.62) | 0              |
|                                 | AC                   | 949  | 1.25 (0.66)  | 1.22 (0.59) | 0.015 (0.017)  |
|                                 | AA                   | 62   | 1.09 (0.64)  | 1.11 (0.53) | -0.074 (0.060) |
|                                 | P value <sup>1</sup> |      | 0.09         | 0.37        |                |
|                                 | P value <sup>2</sup> |      | 0.11         | 0.44        | 0.34           |
| <i>PPARG</i>                    | CC                   | 4290 | 1.22 (0.68)  | 1.22 (0.62) | 0              |
|                                 | CG                   | 1138 | 1.24 (0.67)  | 1.21 (0.62) | 0.001(0.016)   |
|                                 | GG                   | 86   | 1.14 (0.60)  | 1.14 (0.56) | -0.066 (0.051) |
|                                 | P value <sup>1</sup> |      | 0.38         | 0.47        |                |
|                                 | P value <sup>2</sup> |      | 0.22         | 0.47        | 0.58           |
| <i>SLC30A8</i>                  | GG                   | 2416 | 1.21 (0.67)  | 1.21 (0.62) | 0              |
|                                 | GA                   | 2177 | 1.23 (0.68 ) | 1.21 (0.62) | 0.006 (0.014)  |
|                                 | AA                   | 428  | 1.22 (0.64)  | 1.23 (0.62) | 0.010 (0.024)  |
|                                 | P value <sup>1</sup> |      | 0.39         | 0.79        |                |
|                                 | P value <sup>2</sup> |      | 0.44         | 0.84        | 0.72           |
| <i>TCF2</i><br>( <i>HNF1B</i> ) | AA                   | 1395 | 1.20 (0.67)  | 1.20 (0.61) | 0              |
|                                 | AG                   | 2446 | 1.23 (0.69)  | 1.22 (0.62) | 0.016 (0.016)  |
|                                 | GG                   | 1154 | 1.21 (0.65)  | 1.22 (0.61) | 0.006 (0.019)  |
|                                 | P value <sup>1</sup> |      | 0.39         | 0.79        |                |
|                                 | P value <sup>2</sup> |      | 0.21         | 0.72        | 0.84           |
| <i>TCF7L2</i>                   | AA                   | 2365 | 1.21 (0.68)  | 1.22 (0.63) | 0              |
|                                 | AG                   | 2173 | 1.23 (0.67)  | 1.21 (0.62) | 0.004 (0.014)  |
|                                 | GG                   | 467  | 1.18 (0.61)  | 1.18 (0.55) | -0.030 (0.024) |
|                                 | P value <sup>1</sup> |      | 0.26         | 0.41        |                |
|                                 | P value <sup>2</sup> |      | 0.33         | 0.47        | 0.46           |
| <i>THADA</i>                    | AA                   | 3953 | 1.23 (0.68)  | 1.21 (0.62) | 0              |

|                               |                      |      |             |             |                |
|-------------------------------|----------------------|------|-------------|-------------|----------------|
|                               | AG                   | 1003 | 1.19 (0.64) | 1.22 (0.61) | 0.000 (0.016)  |
|                               | GG                   | 75   | 1.15 (0.63) | 1.17 (0.67) | -0.060 (0.054) |
|                               | P value <sup>1</sup> |      | 0.24        | 0.71        |                |
|                               | P value <sup>2</sup> |      | 0.21        | 0.77        | 0.30           |
| <i>TSPAN8,</i><br><i>LGR5</i> | AA                   | 1762 | 1.21 (0.66) | 1.21 (0.61) | 0              |
|                               | AG                   | 2424 | 1.23 (0.67) | 1.22 (0.63) | 0.015 (0.015)  |
|                               | GG                   | 838  | 1.22 (0.69) | 1.19 (0.59) | -0.007 (0.019) |
|                               | P value <sup>1</sup> |      | 0.55        | 0.31        |                |
|                               | P value <sup>2</sup> |      | 0.61        | 0.34        | 0.44           |
| <i>VEGFA</i>                  | GG                   | 2611 | 1.23 (0.68) | 1.21 (0.63) | 0              |
|                               | GA                   | 2008 | 1.22 (0.66) | 1.22 (0.61) | -0.002 (0.014) |
|                               | AA                   | 400  | 1.18 (0.66) | 1.21 (0.58) | -0.013 (0.025) |
|                               | P value <sup>1</sup> |      | 0.42        | 0.90        |                |
|                               | P value <sup>2</sup> |      | 0.27        | 0.91        | 0.65           |

Results are geometric mean (approximate SD)

<sup>1</sup> ANOVA, unadjusted

<sup>2</sup> ANOVA, adjusted for age and gender.

\*recessive model

B(se) is the coefficient for overall genotype effect estimated from a mixed model with age at phase1 and gender included as fixed covariates. The change in cholesterol over time is allowed to vary between subjects.
