# Supplementary material
Source: PubMed Central journal article supplement (PMC4787580)
Supplement: talp672709.wt7_default.pdf [file talp672709.wt7_default.pdf]

**Web table G** Association of genotypes with high density lipoprotein-cholesterol (mmol/l) (phase 3 and phase 7). Results are geometric mean (approximate SD)

| Gene                      | Genotype             | Number | Phase 3     | Phase 7     | Beta-value<br>(standard error) all<br>years combined |
|---------------------------|----------------------|--------|-------------|-------------|------------------------------------------------------|
| <i>ADAMTS9</i>            | GG                   | 2878   | 1.38 (0.39) | 1.52 (0.42) | 0                                                    |
|                           | GA                   | 1857   | 1.37 (0.37) | 1.53 (0.41) | 0.007 (0.007)                                        |
|                           | AA                   | 297    | 1.40 (0.39) | 1.51 (0.40) | 0.006 (0.014)                                        |
|                           | P value <sup>1</sup> |        | 0.63        | 0.60        |                                                      |
|                           | P value <sup>2</sup> |        | 0.79        | 0.32        | 0.70                                                 |
| <i>BCL11A</i>             | AA                   | 2728   | 1.37 (0.39) | 1.51 (0.41) | 0                                                    |
|                           | AG                   | 1909   | 1.39 (0.39) | 1.54 (0.43) | 0.010 (0.007)                                        |
|                           | GG                   | 380    | 1.36 (0.38) | 1.53 (0.42) | 0.004 (0.013)                                        |
|                           | P value <sup>1</sup> |        | 0.11        | 0.21        |                                                      |
|                           | P value <sup>2</sup> |        | 0.23        | 0.41        | 0.31                                                 |
| <i>CALPN10</i>            | GG                   | 2945   | 1.37 (0.39) | 1.52 (0.42) | 0                                                    |
|                           | GA                   | 2150   | 1.38 (0.39) | 1.52 (0.42) | 0.002 (0.0070)                                       |
|                           | AA                   | 378    | 1.41 (0.39) | 1.54 (0.42) | 0.012 (0.013)                                        |
|                           | P value <sup>1</sup> |        | 0.19        | 0.57        |                                                      |
|                           | P value <sup>2</sup> |        | 0.40        | 0.79        | 0.39*                                                |
| <i>CDC123,<br/>CAMK1D</i> | AA                   | 3464   | 1.38 (0.39) | 1.53 (0.41) | 0                                                    |
|                           | AG                   | 1448   | 1.36 (0.38) | 1.51 (0.42) | -0.013 (0.007)                                       |
|                           | GG                   | 124    | 1.42 (0.43) | 1.56 (0.52) | 0.018 (0.022)                                        |
|                           | P value <sup>1</sup> |        | 0.12        | 0.21        |                                                      |
|                           | P value <sup>2</sup> |        | 0.10        | 0.18        | 0.60                                                 |
| <i>CDKALI</i>             | GG                   | 4463   | 1.38 (0.39) | 1.52 (0.42) | 0                                                    |
|                           | GA                   | 543    | 1.39 (0.39) | 1.53 (0.41) | 0.003 (0.011)                                        |
|                           | AA                   | 24     | 1.50 (0.50) | 1.49 (0.40) | 0.035 (0.048)                                        |
|                           | P value <sup>1</sup> |        | 0.30        | 0.93        |                                                      |
|                           | P value <sup>2</sup> |        | 0.31        | 0.89        | 0.57                                                 |
| <i>CDKN</i>               | AA                   | 3257   | 1.38 (0.39) | 1.52 (0.42) | 0                                                    |
|                           | AG                   | 1543   | 1.38 (0.39) | 1.52 (0.42) | -0.001 (0.007)                                       |
|                           | GG                   | 149    | 1.37 (0.40) | 1.54 (0.47) | -0.097 (0.020)                                       |
|                           | P value <sup>1</sup> |        | 0.94        | 0.89        |                                                      |
|                           | P value <sup>2</sup> |        | 0.83        | 0.99        | 0.62                                                 |
| <i>FTO</i>                | TT                   | 1953   | 1.39 (0.39) | 1.53 (0.42) | 0                                                    |
|                           | TC                   | 2716   | 1.38 (0.39) | 1.53 (0.42) | 0.008 (0.007)                                        |
|                           | CC                   | 938    | 1.36 (0.38) | 1.50 (0.41) | -0.013 (0.009)                                       |
|                           | P value <sup>1</sup> |        | 0.14        | 0.19        |                                                      |
|                           | P value <sup>2</sup> |        | 0.16        | 0.17        | 0.40                                                 |
| <i>HHEX</i>               | GG                   | 2635   | 1.38 (0.39) | 1.52 (0.41) | 0                                                    |
|                           | GA                   | 1968   | 1.37 (0.38) | 1.52 (0.43) | -0.002 (0.007)                                       |
|                           | AA                   | 405    | 1.38 (0.40) | 1.52 (0.41) | 0.002 (0.013)                                        |
|                           | P value <sup>1</sup> |        | 0.39        | 0.95        |                                                      |
|                           | P value <sup>2</sup> |        | 0.67        | 0.97        | 0.88                                                 |

|                                 |                      |      |             |             |                |
|---------------------------------|----------------------|------|-------------|-------------|----------------|
| <i>HNF1A</i>                    | CC                   | 5106 | 1.37 (0.39) | 1.52 (0.42) | 0              |
|                                 | CT                   | 301  | 1.40 (0.39) | 1.53 (0.42) | 0.017 (0.014)  |
|                                 | TT                   | 5    | 1.28 (0.22) | 1.43 (0.22) | -0.066 (0.107) |
|                                 | P value <sup>1</sup> |      | 0.55        | 0.79        |                |
|                                 | P value <sup>2</sup> |      | 0.30        | 0.58        | 0.30           |
| <i>IGF2BP2</i>                  | CC                   | 2362 | 1.38 (0.38) | 1.52 (0.41) | 0              |
|                                 | AC                   | 2182 | 1.38 (0.40) | 1.52 (0.43) | -0.002 (0.007) |
|                                 | AA                   | 485  | 1.39 (0.38) | 1.56 (0.41) | 0.012 (0.012)  |
|                                 | P value <sup>1</sup> |      | 0.72        | 0.17        |                |
|                                 | P value <sup>2</sup> |      | 0.91        | 0.25        | 0.30           |
| <i>JAZF1</i>                    | AA                   | 1269 | 1.39 (0.39) | 1.54 (0.43) | 0              |
|                                 | AG                   | 2453 | 1.38 (0.39) | 1.52 (0.42) | -0.005 (0.008) |
|                                 | GG                   | 1304 | 1.37 (0.38) | 1.51 (0.41) | -0.005 (0.009) |
|                                 | P value <sup>1</sup> |      | 0.53        | 0.25        |                |
|                                 | P value <sup>2</sup> |      | 0.97        | 0.54        | 0.79           |
| <i>KCNJ11</i>                   | CC                   | 2313 | 1.38 (0.39) | 1.52 (0.42) | 0              |
|                                 | CT                   | 2478 | 1.38 (0.39) | 1.52 (0.42) | -0.008 (0.007) |
|                                 | TT                   | 720  | 1.37 (0.38) | 1.52 (0.42) | -0.001 (0.010) |
|                                 |                      |      | P=0.89      | P=0.91      |                |
|                                 |                      |      | P=0.91      | P=0.72      | P=0.60         |
| <i>NOTCH2</i>                   | CC                   | 4024 | 1.38 (0.39) | 1.52 (0.42) | 0              |
|                                 | AC                   | 949  | 1.38 (0.38) | 1.52 (0.42) | 0.005 (0.008)  |
|                                 | AA                   | 62   | 1.41 (0.46) | 1.57 (0.40) | 0.015 (0.030)  |
|                                 | P value <sup>1</sup> |      | 0.67        | 0.69        |                |
|                                 | P value <sup>2</sup> |      | 0.77        | 0.93        | 0.53           |
| <i>PPARG</i>                    | CC                   | 4290 | 1.38 (0.39) | 1.52 (0.42) | 0              |
|                                 | CG                   | 1138 | 1.39 (0.39) | 1.53 (0.43) | 0.006 (0.008)  |
|                                 | GG                   | 86   | 1.43 (0.44) | 1.56 (0.43) | 0.029 (0.026)  |
|                                 | P value <sup>1</sup> |      | 0.37        | 0.38        |                |
|                                 | P value <sup>2</sup> |      | 0.44        | 0.43        | 0.23           |
| <i>SLC30A8</i>                  | GG                   | 2416 | 1.38 (0.39) | 1.53 (0.42) | 0              |
|                                 | GA                   | 2177 | 1.37 (0.39) | 1.51 (0.41) | -0.009 (0.007) |
|                                 | AA                   | 428  | 1.37 (0.39) | 1.52 (0.43) | -0.003 (0.012) |
|                                 | P value <sup>1</sup> |      | 0.61        | 0.27        |                |
|                                 | P value <sup>2</sup> |      | 0.61        | 0.25        | 0.95           |
| <i>TCF2</i><br>( <i>HNF1B</i> ) | AA                   | 1395 | 1.38 (0.39) | 1.53 (0.42) | 0              |
|                                 | AG                   | 2446 | 1.37 (0.39) | 1.52 (0.42) | -0.009 (0.008) |
|                                 | GG                   | 1154 | 1.38 (0.38) | 1.53 (0.42) | 0.002 (0.009)  |
|                                 | P value <sup>1</sup> |      | 0.73        | 0.64        |                |
|                                 | P value <sup>2</sup> |      | 0.29        | 0.25        | 0.42           |
| <i>TCF7L2</i>                   | AA                   | 2365 | 1.38 (0.39) | 1.52 (0.42) | 0              |
|                                 | AG                   | 2173 | 1.37 (0.38) | 1.51 (0.41) | 0.0 (0.007)    |
|                                 | GG                   | 467  | 1.42 (0.41) | 1.58 (0.43) | 0.035 (0.012)  |
|                                 | P value <sup>1</sup> |      | 0.03        | 0.02        |                |
|                                 | P value <sup>2</sup> |      | 0.05        | 0.04        | 0.04           |
| <i>THADA</i>                    | AA                   | 3953 | 1.38 (0.39) | 1.52 (0.42) | 0              |

|                               |                      |      |             |             |                |
|-------------------------------|----------------------|------|-------------|-------------|----------------|
|                               | AG                   | 1003 | 1.37 (0.38) | 1.52 (0.41) | -0.003 (0.008) |
|                               | GG                   | 75   | 1.36 (0.39) | 1.49 (0.40) | -0.021 (0.028) |
|                               | P value <sup>1</sup> |      | 0.87        | 0.66        |                |
|                               | P value <sup>2</sup> |      | 0.89        | 0.46        | 0.41           |
| <i>TSPAN8,</i><br><i>LGR5</i> | AA                   | 1762 | 1.37 (0.39) | 1.51 (0.41) | 0              |
|                               | AG                   | 2424 | 1.38 (0.39) | 1.53 (0.42) | 0.014 (0.007)  |
|                               | GG                   | 838  | 1.38 (0.39) | 1.54 (0.42) | 0.013 (0.010)  |
|                               | P value <sup>1</sup> |      | 0.34        | 0.25        |                |
|                               | P value <sup>2</sup> |      | 0.11        | 0.07        | 0.40           |
| <i>VEGFA</i>                  | GG                   | 2611 | 1.38 (0.39) | 1.53 (0.42) | 0              |
|                               | GA                   | 2008 | 1.37 (0.39) | 1.52 (0.42) | -0.004 (0.007) |
|                               | AA                   | 400  | 1.40 (0.40) | 1.51 (0.43) | 0.006 (0.013)  |
|                               | P value <sup>1</sup> |      | 0.53        | 0.64        |                |
|                               | P value <sup>2</sup> |      | 0.38        | 0.71        | 0.99           |

<sup>1</sup> ANOVA, unadjusted

<sup>2</sup> ANOVA, adjusted for age and gender.

B(se) is the coefficient for overall genotype effect estimated from a mixed model with age at phase1 and gender included as fixed covariates. The change in cholesterol over time is allowed to vary between subjects..
