# Supplementary material
Source: PubMed Central journal article supplement (PMC4787580)
Supplement: talp672709.wt8_default.pdf [file talp672709.wt8_default.pdf]

**Web table H** Association of genotypes with fasting glucose (mmol/l) (phase 3 and phase 7).

| Gene                  | Genotype             | Number | Phase 3     | Phase 7     | Beta-value (standard error) all years combined |
|-----------------------|----------------------|--------|-------------|-------------|------------------------------------------------|
| <i>ADAMTS9</i>        | GG                   | 2878   | 5.19 (0.53) | 5.35 (0.85) | 0                                              |
|                       | GA                   | 1857   | 5.20 (0.51) | 5.36 (0.85) | -0.001 (0.003)                                 |
|                       | AA                   | 297    | 5.18 (0.44) | 5.36 (0.85) | 0.003 (0.007)                                  |
|                       | P value <sup>1</sup> |        | 0.90        | 0.96        |                                                |
|                       | P value <sup>2</sup> |        | 0.93        | 0.96        | 0.88                                           |
| <i>BCL11A</i>         | AA                   | 2728   | 5.20 (0.54) | 5.37 (0.87) | 0                                              |
|                       | AG                   | 1909   | 5.19 (0.50) | 5.34 (0.82) | -0.003 (0.003)                                 |
|                       | GG                   | 380    | 5.19 (0.45) | 5.34 (0.87) | -0.005 (0.006)                                 |
|                       | P value <sup>1</sup> |        | 0.98        | 0.52        |                                                |
|                       | P value <sup>2</sup> |        | 0.95        | 0.58        | 0.28                                           |
| <i>CALPN10</i>        | GG                   | 2945   | 5.18 (0.52) | 5.36 (0.81) | 0                                              |
|                       | GA                   | 2150   | 5.20 (0.53) | 5.35 (0.91) | 0.000 (0.003)                                  |
|                       | AA                   | 378    | 5.17 (0.52) | 5.32 (0.76) | -0.005 (0.006)                                 |
|                       | P value <sup>1</sup> |        | 0.33        | 0.64        |                                                |
|                       | P value <sup>2</sup> |        | 0.30        | 0.74        | 0.64                                           |
| <i>CDC123, CAMK1D</i> | AA                   | 3464   | 5.20 (0.52) | 5.35 (0.83) | 0                                              |
|                       | AG                   | 1448   | 5.18 (0.47) | 5.35 (0.86) | -0.001 (0.004)                                 |
|                       | GG                   | 124    | 5.21 (0.74) | 5.43 (1.15) | 0.005 (0.010)                                  |
|                       | P value <sup>1</sup> |        | 0.75        | 0.60        |                                                |
|                       | P value <sup>2</sup> |        | 0.70        | 0.51        | 0.90                                           |
| <i>CDKALI</i>         | GG                   | 4463   | 5.20 (0.52) | 5.36 (0.85) | 0                                              |
|                       | GA                   | 543    | 5.15 (0.53) | 5.32 (0.85) | -0.005 (0.005)                                 |
|                       | AA                   | 24     | 5.32 (0.77) | 5.70 (1.45) | 0.032 (0.023)                                  |
|                       | P value <sup>1</sup> |        | 0.09        | 0.10        |                                                |
|                       | P value <sup>2</sup> |        | 0.10        | 0.11        | 0.73                                           |
| <i>CDKN</i>           | AA                   | 3257   | 5.18 (0.52) | 5.35 (0.86) | 0                                              |
|                       | AG                   | 1543   | 5.22 (0.51) | 5.35 (0.82) | 0.004 (0.003)                                  |
|                       | GG                   | 149    | 5.23 (0.55) | 5.47 (1.10) | 0.022 (0.009)                                  |
|                       | P value <sup>1</sup> |        | 0.03        | 0.28        |                                                |
|                       | P value <sup>2</sup> |        | 0.03        | 0.25        | 0.03                                           |
| <i>FTO</i>            | TT                   | 1953   | 5.19 (0.53) | 5.34 (0.85) | 0                                              |
|                       | TC                   | 2716   | 5.19 (0.52) | 5.34 (0.82) | -0.001 (0.003)                                 |
|                       | CC                   | 938    | 5.20 (0.54) | 5.41 (0.96) | 0.007 (0.005)                                  |
|                       | P value <sup>1</sup> |        | 0.74        | 0.11        |                                                |
|                       | P value <sup>2</sup> |        | 0.68        | 0.14        | 0.24                                           |
| <i>HHEX</i>           | GG                   | 2635   | 5.21 (0.54) | 5.36 (0.87) | 0                                              |
|                       | GA                   | 1968   | 5.18 (0.49) | 5.35 (0.84) | -0.005 (0.003)                                 |
|                       | AA                   | 405    | 5.18 (0.48) | 5.31 (0.74) | -0.004 (0.006)                                 |
|                       | P value <sup>1</sup> |        | 0.21        | 0.44        |                                                |
|                       | P value <sup>2</sup> |        | 0.12        | 0.40        | 0.22                                           |
| <i>HNF1A</i>          | CC                   | 5106   | 5.19 (0.52) | 5.35 (0.85) | 0                                              |

|                               |                      |      |             |             |                |
|-------------------------------|----------------------|------|-------------|-------------|----------------|
|                               | CT                   | 301  | 5.22 (0.56) | 5.38 (0.94) | 0.005 (0.007)  |
|                               | TT                   | 5    | 5.62 (0.45) | 5.56 (0.56) | 0.092 (0.053)  |
|                               | P value <sup>1</sup> |      | 0.26        | 0.74        |                |
|                               | P value <sup>2</sup> |      | 0.19        | 0.66        | 0.25           |
| <i>IGF2BP2</i>                | CC                   | 2362 | 5.17 (0.50) | 5.33 (0.85) | 0              |
|                               | AC                   | 2182 | 5.22 (0.54) | 5.39 (0.87) | 0.007 (0.003)  |
|                               | AA                   | 485  | 5.18 (0.48) | 5.32 (0.72) | -0.002 (0.006) |
|                               | P value <sup>1</sup> |      | 0.02        | 0.05        |                |
|                               | P value <sup>2</sup> |      | 0.02        | 0.06        | 0.36           |
| <i>JAZF1</i>                  | AA                   | 1269 | 5.18 (0.50) | 5.36 (0.85) | 0              |
|                               | AG                   | 2453 | 5.20 (0.54) | 5.35 (0.83) | -0.001 (0.004) |
|                               | GG                   | 1304 | 5.20 (0.50) | 5.34 (0.88) | -0.003 (0.004) |
|                               | P value <sup>1</sup> |      | 0.48        | 0.84        |                |
|                               | P value <sup>2</sup> |      | 0.62        | 0.66        | 0.47           |
| <i>KCNJ11</i>                 | CC                   | 2313 | 5.18 (0.54) | 5.33 (0.81) | 0              |
|                               | CT                   | 2478 | 5.20 (0.51) | 5.37 (0.89) | 0.006 (0.003)  |
|                               | TT                   | 720  | 5.20 (0.54) | 5.40 (0.89) | 0.006 (0.005)  |
|                               | P value <sup>1</sup> |      | 0.59        | 0.11        |                |
|                               | P value <sup>2</sup> |      | 0.44        | 0.10        | 0.07           |
| <i>NOTCH2</i>                 | CC                   | 4024 | 5.19 (0.52) | 5.35 (0.86) | 0              |
|                               | AC                   | 949  | 5.21 (0.52) | 5.37 (0.84) | 0.002 (0.004)  |
|                               | AA                   | 62   | 5.11 (0.66) | 5.29 (0.53) | -0.012 (0.014) |
|                               | P value <sup>1</sup> |      | 0.35        | 0.73        |                |
|                               | P value <sup>2</sup> |      | 0.39        | 0.78        | 0.995          |
| <i>PPARG</i>                  | CC                   | 4290 | 5.20 (0.52) | 5.35 (0.84) | 0              |
|                               | CG                   | 1138 | 5.17 (0.53) | 5.36 (0.89) | -0.001 (0.004) |
|                               | GG                   | 86   | 5.14 (0.51) | 5.43 (0.99) | -0.000 (0.013) |
|                               | P value <sup>1</sup> |      | 0.16        | 0.68        |                |
|                               | P value <sup>2</sup> |      | 0.18        | 0.70        | 0.85           |
| <i>SLC30A8</i>                | GG                   | 2416 | 5.19 (0.53) | 5.36 (0.85) | 0              |
|                               | GA                   | 2177 | 5.20 (0.51) | 5.35 (0.85) | -0.003 (0.003) |
|                               | AA                   | 428  | 5.19 (0.47) | 5.31 (0.86) | -0.008 (0.006) |
|                               | P value <sup>1</sup> |      | 0.92        | 0.50        |                |
|                               | P value <sup>2</sup> |      | 0.77        | 0.39        | 0.13           |
| <i>TCF2</i><br><i>(HNF1B)</i> | AA                   | 1395 | 5.21 (0.51) | 5.34 (0.78) | 0              |
|                               | AG                   | 2446 | 5.18 (0.54) | 5.35 (0.87) | -0.000 (0.004) |
|                               | GG                   | 1154 | 5.22 (0.49) | 5.37 (0.90) | 0.003 (0.005)  |
|                               | P value <sup>1</sup> |      | 0.08        | 0.72        |                |
|                               | P value <sup>2</sup> |      | 0.14        | 0.79        | 0.47           |
| <i>TCF7L2</i>                 | AA                   | 2365 | 5.19 (0.52) | 5.34 (0.82) | 0              |
|                               | AG                   | 2173 | 5.20 (0.52) | 5.36 (0.89) | 0.003 (0.003)  |
|                               | GG                   | 467  | 5.22 (0.51) | 5.37 (0.84) | 0.002 (0.006)  |
|                               | P value <sup>1</sup> |      | 0.59        | 0.59        |                |
|                               | P value <sup>2</sup> |      | 0.52        | 0.56        | 0.48           |
| <i>THADA</i>                  | AA                   | 3953 | 5.20 (0.51) | 5.36 (0.86) | 0              |
|                               | AG                   | 1003 | 5.17 (0.54) | 5.34 (0.77) | -0.004 (0.004) |

|                                |                                                                |                         |                                                           |                                                           |                                                   |
|--------------------------------|----------------------------------------------------------------|-------------------------|-----------------------------------------------------------|-----------------------------------------------------------|---------------------------------------------------|
|                                | GG<br>P value <sup>1</sup><br>P value <sup>2</sup>             | 75                      | 5.18 (0.43)<br>0.15<br>0.14                               | 5.35 (1.09)<br>0.92<br>0.91                               | 0.003 (0.013)<br><br>0.43                         |
| <i>TSPAN8</i> ,<br><i>LGR5</i> | AA<br>AG<br>GG<br>P value <sup>1</sup><br>P value <sup>2</sup> | 1762<br>2424<br><br>838 | 5.18 (0.52)<br>5.20 (0.52)<br>5.18 (0.50)<br>0.40<br>0.45 | 5.36 (0.90)<br>5.35 (0.83)<br>5.35 (0.80)<br>0.83<br>0.75 | 0<br>-0.001 (0.004)<br>-0.004 (0.005)<br><br>0.44 |
| <i>VEGFA</i>                   | GG<br>GA<br>AA<br>P value <sup>1</sup><br>P value <sup>2</sup> | 2611<br>2008<br>400     | 5.20 (0.53)<br>5.19 (0.51)<br>5.20 (0.47)<br>0.85<br>0.70 | 5.34 (0.80)<br>5.38 (0.93)<br>5.31 (0.73)<br>0.20<br>0.22 | 0<br>0.004 (0.003)<br>-0.001 (0.006)<br><br>0.54  |

Results are geometric mean (approximate SD)

<sup>1</sup> ANOVA, unadjusted

<sup>2</sup> ANOVA, adjusted for age and gender.
