# Supplementary material
Source: PubMed Central journal article supplement (PMC4787580)
Supplement: talp672709.wt9_default.pdf [file talp672709.wt9_default.pdf]

**Web table I** Association of genotypes with 2hr glucose after the oral glucose tolerance test (mmol/l) (phase 3 and phase 7). Results are geometric mean (approximate SD)

| Gene                  | Genotype             | Number | Phase 3     | Phase 7     | Beta-value (standard error) all years combined |
|-----------------------|----------------------|--------|-------------|-------------|------------------------------------------------|
| <i>ADAMTS9</i>        | GG                   | 2878   | 5.28 (1.60) | 6.18 (1.72) | 0                                              |
|                       | GA                   | 1857   | 5.23 (1.52) | 6.27 (1.88) | -0.000 (0.007)                                 |
|                       | AA                   | 297    | 5.40 (1.51) | 6.26 (1.93) | 0.023 (0.015)                                  |
|                       | P value <sup>1</sup> |        | 0.24        | 0.37        |                                                |
|                       | P value <sup>2</sup> |        | 0.30        | 0.51        | 0.32                                           |
| <i>BCL11A</i>         | AA                   | 2728   | 5.26 (1.53) | 6.22 (1.78) | 0                                              |
|                       | AG                   | 1909   | 5.27 (1.62) | 6.23 (1.79) | 0.003 (0.007)                                  |
|                       | GG                   | 380    | 5.26 (1.59) | 6.12 (1.92) | 0.001 (0.013)                                  |
|                       | P value <sup>1</sup> |        | 0.97        | 0.60        |                                                |
|                       | P value <sup>2</sup> |        | 0.997       | 0.65        | 0.76                                           |
| <i>CALPN10</i>        | GG                   | 2945   | 5.17 (1.59) | 6.23 (1.79) | 0                                              |
|                       | GA                   | 2150   | 5.24 (1.56) | 6.27 (1.78) | 0.005 (0.007)                                  |
|                       | AA                   | 378    | 5.18 (1.52) | 6.24 (1.64) | -0.001 (0.013)                                 |
|                       | P value <sup>1</sup> |        | 0.62        | 0.74        |                                                |
|                       | P value <sup>2</sup> |        | 0.59        | 0.63        | 0.66                                           |
| <i>CDC123, CAMK1D</i> | AA                   | 3464   | 5.31 (1.59) | 6.28 (1.86) | 0                                              |
|                       | AG                   | 1448   | 5.18 (1.52) | 6.12 (1.64) | -0.021 (0.007)                                 |
|                       | GG                   | 124    | 5.00 (1.46) | 5.77 (1.55) | -0.063 (0.022)                                 |
|                       | P value <sup>1</sup> |        | 0.01        | 0.002       |                                                |
|                       | P value <sup>2</sup> |        | 0.01        | 0.003       | <0.0001                                        |
| <i>CDKALI</i>         | GG                   | 4463   | 5.27 (1.57) | 6.22 (1.79) | 0                                              |
|                       | GA                   | 543    | 5.19 (1.53) | 6.25 (1.82) | -0.001 (0.011)                                 |
|                       | AA                   | 24     | 5.82 (2.21) | 5.63 (1.75) | -0.007 (0.050)                                 |
|                       | P value <sup>1</sup> |        | 0.14        | 0.36        |                                                |
|                       | P value <sup>2</sup> |        | 0.23        | 0.23        | 0.87                                           |
| <i>CDKN</i>           | AA                   | 3257   | 5.24 (1.57) | 6.20 (1.81) | 0                                              |
|                       | AG                   | 1543   | 5.29 (1.55) | 6.23 (1.79) | 0.010 (0.007)                                  |
|                       | GG                   | 149    | 5.28 (1.55) | 6.31 (1.68) | 0.019 (0.020)                                  |
|                       | P value <sup>1</sup> |        | 0.62        | 0.78        |                                                |
|                       | P value <sup>2</sup> |        | 0.67        | 0.82        | 0.12                                           |
| <i>FTO</i>            | TT                   | 1953   | 5.27 (1.59) | 6.31 (1.79) | 0                                              |
|                       | TC                   | 2716   | 5.24 (1.57) | 6.16 (1.78) | -0.006 (0.007)                                 |
|                       | CC                   | 938    | 5.27 (1.55) | 6.31 (1.78) | -0.000 (0.009)                                 |
|                       | P value <sup>1</sup> |        | 0.81        | 0.02        |                                                |
|                       | P value <sup>2</sup> |        | 0.86        | 0.02        | 0.80                                           |
| <i>HHEX</i>           | GG                   | 2635   | 5.22 (1.54) | 6.19 (1.79) | 0                                              |
|                       | GA                   | 1968   | 5.33 (1.61) | 6.27 (1.81) | 0.015 (0.007)                                  |
|                       | AA                   | 405    | 5.22 (1.51) | 6.16 (1.75) | 0.003 (0.013)                                  |
|                       | P value <sup>1</sup> |        | 0.09        | 0.37        |                                                |
|                       | P value <sup>2</sup> |        | 0.08        | 0.43        | 0.19                                           |
| <i>HNF1A</i>          | CC                   | 5106   | 5.26 (1.57) | 6.25 (1.78) | 0                                              |

|                               |                      |      |             |             |                |
|-------------------------------|----------------------|------|-------------|-------------|----------------|
|                               | CT                   | 301  | 5.04 (1.52) | 6.11 (1.82) | -0.015 (0.014) |
|                               | TT                   | 5    | 5.74 (1.47) | 6.49 (3.57) | 0.009 (0.113)  |
|                               | P value <sup>1</sup> |      | 0.08        | 0.48        |                |
|                               | P value <sup>2</sup> |      | 0.11        | 0.67        | 0.31           |
| <i>IGF2BP2</i>                | CC                   | 2362 | 5.22 (1.53) | 6.19 (1.78) | 0              |
|                               | AC                   | 2182 | 5.32 (1.58) | 6.24 (1.81) | 0.015 (0.007)  |
|                               | AA                   | 485  | 5.25 (1.68) | 6.21 (1.79) | 0.012 (0.012)  |
|                               | P value <sup>1</sup> |      | 0.12        | 0.66        |                |
|                               | P value <sup>2</sup> |      | 0.13        | 0.61        | 0.07           |
| <i>JAZF1</i>                  | AA                   | 1269 | 5.33 (1.64) | 6.27 (1.84) | 0              |
|                               | AG                   | 2453 | 5.26 (1.54) | 6.21 (1.78) | -0.007 (0.008) |
|                               | GG                   | 1304 | 5.21 (1.55) | 6.20 (1.78) | -0.020 (0.009) |
|                               | P value <sup>1</sup> |      | 0.18        | 0.64        |                |
|                               | P value <sup>2</sup> |      | 0.18        | 0.34        | 0.03           |
| <i>KCNJ11</i>                 | CC                   | 2313 | 5.18 (1.54) | 6.18 (1.73) | 0              |
|                               | CT                   | 2478 | 5.31 (1.60) | 6.27 (1.78) | 0.016 (0.007)  |
|                               | TT                   | 720  | 5.29 (1.58) | 6.33 (1.96) | 0.020 (0.010)  |
|                               | P value <sup>1</sup> |      | 0.02        | 0.14        |                |
|                               | P value <sup>2</sup> |      | 0.01        | 0.10        | 0.01           |
| <i>NOTCH2</i>                 | CC                   | 4024 | 5.26 (1.55) | 6.19 (1.77) | 0              |
|                               | AC                   | 949  | 5.29 (1.63) | 6.33 (1.90) | 0.011 (0.009)  |
|                               | AA                   | 62   | 5.35 (1.45) | 6.21 (1.53) | 0.003 (0.031)  |
|                               | P value <sup>1</sup> |      | 0.84        | 0.16        |                |
|                               | P value <sup>2</sup> |      | 0.91        | 0.23        | 0.24           |
| <i>PPARG</i>                  | CC                   | 4290 | 5.27 (1.58) | 6.26 (1.78) | 0              |
|                               | CG                   | 1138 | 5.18 (1.51) | 6.17 (1.78) | -0.008 (0.008) |
|                               | GG                   | 86   | 5.45 (1.62) | 6.19 (2.02) | -0.005 (0.026) |
|                               | P value <sup>1</sup> |      | 0.15        | 0.39        |                |
|                               | P value <sup>2</sup> |      | 0.20        | 0.45        | 0.35           |
| <i>SLC30A8</i>                | GG                   | 2416 | 5.25 (1.55) | 6.17 (1.79) | 0              |
|                               | GA                   | 2177 | 5.27 (1.59) | 6.25 (1.80) | 0.004 (0.007)  |
|                               | AA                   | 428  | 5.29 (1.49) | 6.36 (1.73) | 0.009 (0.013)  |
|                               | P value <sup>1</sup> |      | 0.86        | 0.14        |                |
|                               | P value <sup>2</sup> |      | 0.94        | 0.28        | 0.43           |
| <i>TCF2</i><br><i>(HNF1B)</i> | AA                   | 1395 | 5.25 (1.51) | 6.18 (1.84) | 0              |
|                               | AG                   | 2446 | 5.22 (1.58) | 6.18 (1.75) | -0.004 (0.008) |
|                               | GG                   | 1154 | 5.39 (1.60) | 6.32 (1.81) | 0.024 (0.009)  |
|                               | P value <sup>1</sup> |      | 0.01        | 0.12        |                |
|                               | P value <sup>2</sup> |      | 0.01        | 0.16        | 0.02           |
| <i>TCF7L2</i>                 | AA                   | 2365 | 5.24 (1.58) | 6.11 (1.75) | 0              |
|                               | AG                   | 2173 | 5.25 (1.55) | 6.30 (1.78) | 0.016 (0.007)  |
|                               | GG                   | 467  | 5.46 (1.59) | 6.41 (2.01) | 0.040 (0.012)  |
|                               | P value <sup>1</sup> |      | 0.03        | 0.001       |                |
|                               | P value <sup>2</sup> |      | 0.04        | 0.001       | <0.001         |
| <i>THADA</i>                  | AA                   | 3953 | 5.27 (1.58) | 6.23 (1.81) | 0              |
|                               | AG                   | 1003 | 5.23 (1.54) | 6.15 (1.75) | -0.009 (0.008) |

|                                |                                                                |                     |                                                           |                                                           |                                                   |
|--------------------------------|----------------------------------------------------------------|---------------------|-----------------------------------------------------------|-----------------------------------------------------------|---------------------------------------------------|
|                                | GG<br>P value <sup>1</sup><br>P value <sup>2</sup>             | 75                  | 5.17 (1.29)<br>0.69<br>0.71                               | 6.43 (1.55)<br>0.36<br>0.49                               | -0.018 (0.028)<br><br>0.24                        |
| <i>TSPAN8</i> ,<br><i>LGR5</i> | AA<br>AG<br>GG<br>P value <sup>1</sup><br>P value <sup>2</sup> | 1762<br>2424<br>838 | 5.29 (1.55)<br>5.26 (1.61)<br>5.23 (1.50)<br>0.72<br>0.76 | 6.21 (1.74)<br>6.23 (1.81)<br>6.20 (1.87)<br>0.94<br>0.88 | 0<br>-0.001 (0.007)<br>-0.004 (0.010)<br><br>0.69 |
| <i>VEGFA</i>                   | GG<br>GA<br>AA<br>P value <sup>1</sup><br>P value <sup>2</sup> | 2611<br>2008<br>400 | 5.26 (1.57)<br>5.26 (1.58)<br>5.28 (1.51)<br>0.97<br>0.93 | 6.16 (1.76)<br>6.29 (1.84)<br>6.19 (1.74)<br>0.10<br>0.17 | 0<br>0.007 (0.007)<br>0.002 (0.013)<br><br>0.51   |

<sup>1</sup> ANOVA, unadjusted

<sup>2</sup> ANOVA, adjusted for age and gender.
