# Supplementary material
Source: PubMed Central journal article supplement (PMC4787580)
Supplement: talp672709.wt10_default.pdf [file talp672709.wt10_default.pdf]

**Web table J** Association of genotypes with body mass index (kg/m<sup>2</sup>)(phase 3 and phase 7)

| Gene                  | Genotype             | Number | Phase 3    | Phase 7    | Beta-value (standard error) all years combined |
|-----------------------|----------------------|--------|------------|------------|------------------------------------------------|
| <i>ADAMTS9</i>        | GG                   | 2878   | 24.8 (3.4) | 26.3 (4.0) | 0                                              |
|                       | GA                   | 1857   | 24.9 (3.4) | 26.4 (4.1) | 0.005 (0.004)                                  |
|                       | AA                   | 297    | 25.3 (3.4) | 26.8 (4.4) | 0.017 (0.008)                                  |
|                       | P value <sup>1</sup> |        | 0.03       | 0.04       |                                                |
|                       | P value <sup>2</sup> |        | 0.05       | 0.05       | 0.02                                           |
| <i>BCL11A</i>         | AA                   | 2728   | 24.9 (3.4) | 26.4 (4.1) | 0                                              |
|                       | AG                   | 1909   | 24.8 (3.3) | 26.3 (4.0) | -0.002 (0.004)                                 |
|                       | GG                   | 380    | 24.7 (3.3) | 26.2 (4.0) | -0.009 (0.007)                                 |
|                       | P value <sup>1</sup> |        | 0.58       | 0.55       |                                                |
|                       | P value <sup>2</sup> |        | 0.53       | 0.54       | 0.25                                           |
| <i>CALPN10</i>        | GG                   | 2945   | 24.9 (3.3) | 26.3 (4.1) | 0                                              |
|                       | GA                   | 2150   | 24.9 (3.4) | 26.4 (4.1) | 0.004 (0.004)                                  |
|                       | AA                   | 378    | 24.8 (3.5) | 26.4 (4.3) | -0.001 (0.007)                                 |
|                       | P value <sup>1</sup> |        | 0.80       | 0.84       |                                                |
|                       | P value <sup>2</sup> |        | 0.74       | 0.84       | 0.57                                           |
| <i>CDC123, CAMK1D</i> | AA                   | 3464   | 24.9 (3.4) | 26.3 (4.0) | 0                                              |
|                       | AG                   | 1448   | 24.9 (3.4) | 26.4 (4.2) | 0.003 (0.004)                                  |
|                       | GG                   | 124    | 24.7 (3.7) | 25.9 (4.2) | -0.001 (0.012)                                 |
|                       | P value <sup>1</sup> |        | 0.82       | 0.45       |                                                |
|                       | P value <sup>2</sup> |        | 0.85       | 0.44       | 0.62                                           |
| <i>CDKALI</i>         | GG                   | 4463   | 24.9 (3.4) | 26.4 (4.1) | 0                                              |
|                       | GA                   | 543    | 24.9 (3.4) | 26.4 (4.2) | -0.001 (0.006)                                 |
|                       | AA                   | 24     | 24.4 (2.9) | 25.4 (2.8) | -0.019 (0.026)                                 |
|                       | P value <sup>1</sup> |        | 0.77       | 0.48       |                                                |
|                       | P value <sup>2</sup> |        | 0.65       | 0.46       | 0.71                                           |
| <i>CDKN</i>           | AA                   | 3257   | 24.8 (3.4) | 26.3 (4.1) | 0                                              |
|                       | AG                   | 1543   | 24.9 (3.3) | 26.4 (4.0) | 0.006 (0.004)                                  |
|                       | GG                   | 149    | 25.1 (3.2) | 26.6 (3.8) | 0.012 (0.011)                                  |
|                       | P value <sup>1</sup> |        | 0.37       | 0.58       |                                                |
|                       | P value <sup>2</sup> |        | 0.45       | 0.60       | 0.08                                           |
| <i>FTO</i>            | TT                   | 1953   | 24.7 (3.3) | 26.1 (4.0) | 0                                              |
|                       | TC                   | 2716   | 24.8 (3.3) | 26.3 (4.1) | 0.009 (0.004)                                  |
|                       | CC                   | 938    | 25.5 (3.6) | 26.9 (4.3) | 0.030 (0.005)                                  |
|                       | P value <sup>1</sup> |        | <0.0001    | <0.0001    |                                                |
|                       | P value <sup>2</sup> |        | <0.0001    | <0.0001    | <0.0001                                        |
| <i>HHEX</i>           | GG                   | 2635   | 24.9 (3.4) | 26.4 (4.0) | 0                                              |
|                       | GA                   | 1968   | 24.8 (3.4) | 26.3 (4.1) | -0.006 (0.004)                                 |
|                       | AA                   | 405    | 24.7 (3.3) | 26.0 (4.1) | -0.007 (0.007)                                 |
|                       | P value <sup>1</sup> |        | 0.31       | 0.13       |                                                |
|                       | P value <sup>2</sup> |        | 0.35       | 0.14       | 0.09                                           |
| <i>HNF1A</i>          | CC                   | 5106   | 24.9 (3.4) | 26.3 (4.1) | 0                                              |

|                                 |                                                                |                      |                                                        |                                                        |                                                   |
|---------------------------------|----------------------------------------------------------------|----------------------|--------------------------------------------------------|--------------------------------------------------------|---------------------------------------------------|
|                                 | CT<br>TT<br>P value <sup>1</sup><br>P value <sup>2</sup>       | 301<br>5             | 25.2 (3.3)<br>24.7 (1.7)<br>0.31<br>0.22               | 26.6 (4.3)<br>26.5 (0.6)<br>0.48<br>0.45               | 0.011 (0.008)<br>0.015 (0.057)<br><br>0.14        |
| <i>IGF2BP2</i>                  | CC<br>AC<br>AA<br>P value <sup>1</sup><br>P value <sup>2</sup> | 2362<br>2182<br>485  | 24.9 (3.3)<br>24.8 (3.4)<br>24.9 (3.6)<br>0.84<br>0.81 | 26.4 (4.0)<br>26.3 (4.0)<br>26.3 (4.5)<br>0.82<br>0.81 | 0<br>-0.002 (0.004)<br>0.005 (0.006)<br><br>0.78  |
| <i>JAZF1</i>                    | AA<br>AG<br>GG<br>P value <sup>1</sup><br>P value <sup>2</sup> | 1269<br>2453<br>1304 | 24.8 (3.3)<br>24.9 (3.4)<br>25.0 (3.4)<br>0.32<br>0.37 | 26.1 (4.0)<br>26.4 (4.1)<br>26.5 (4.1)<br>0.03<br>0.03 | 0<br>0.003 (0.004)<br>0.004 (0.005)<br><br>0.40   |
| <i>KCNJ11</i>                   | CC<br>CT<br>TT<br>P value <sup>1</sup><br>P value <sup>2</sup> | 2313<br>2478<br>720  | 24.9 (3.4)<br>24.9 (3.4)<br>25.0 (3.5)<br>0.46<br>0.46 | 26.3 (4.1)<br>26.4 (4.1)<br>26.5 (4.1)<br>0.40<br>0.41 | 0<br>-0.001 (0.004)<br>0.006 (0.005)<br><br>0.39  |
| <i>NOTCH2</i>                   | CC<br>AC<br>AA<br>P value <sup>1</sup><br>P value <sup>2</sup> | 4024<br>949<br>62    | 24.9 (3.4)<br>24.8 (3.3)<br>24.8 (2.8)<br>0.83<br>0.73 | 26.4 (4.1)<br>26.3 (4.0)<br>26.5 (3.6)<br>0.73<br>0.73 | 0<br>-0.004 (0.005)<br>-0.015 (0.016)<br><br>0.28 |
| <i>PPARG</i>                    | CC<br>CG<br>GG<br>P value <sup>1</sup><br>P value <sup>2</sup> | 4290<br>1138<br>86   | 24.9 (3.4)<br>24.8 (3.4)<br>24.5 (3.7)<br>0.48<br>0.38 | 26.4 (4.1)<br>26.3 (4.1)<br>25.8 (4.1)<br>0.35<br>0.33 | 0<br>-0.002 (0.004)<br>-0.021 (0.014)<br><br>0.26 |
| <i>SLC30A8</i>                  | GG<br>GA<br>AA<br>P value <sup>1</sup><br>P value <sup>2</sup> | 2416<br>2177<br>428  | 24.8 (3.4)<br>24.9 (3.4)<br>24.9 (3.5)<br>0.35<br>0.44 | 26.3 (4.1)<br>26.4 (4.1)<br>26.2 (4.1)<br>0.37<br>0.38 | 0<br>0.003 (0.004)<br>0.001 (0.007)<br><br>0.60   |
| <i>TCF2</i><br>( <i>HNF1B</i> ) | AA<br>AG<br>GG<br>P value <sup>1</sup><br>P value <sup>2</sup> | 1395<br>2446<br>1154 | 24.9 (3.3)<br>24.9 (3.4)<br>24.8 (3.4)<br>0.98<br>0.95 | 26.4 (4.0)<br>26.3 (4.1)<br>26.3 (4.1)<br>0.88<br>0.86 | 0<br>0.001 (0.004)<br>0.001 (0.005)<br><br>0.81   |
| <i>TCF7L2</i>                   | AA<br>AG<br>GG<br>P value <sup>1</sup><br>P value <sup>2</sup> | 2365<br>2173<br>467  | 24.9 (3.4)<br>24.9 (3.4)<br>24.7 (3.2)<br>0.36<br>0.33 | 26.4 (4.1)<br>26.4 (4.1)<br>26.1 (3.9)<br>0.44<br>0.42 | 0<br>-0.000 (0.004)<br>-0.007 (0.006)<br><br>0.44 |
| <i>THADA</i>                    | AA<br>AG                                                       | 3953<br>1003         | 24.8 (3.4)<br>25.0 (3.5)                               | 26.3 (4.1)<br>26.6 (4.1)                               | 0<br>0.006 (0.004)                                |

|                               |                                                                |                     |                                                        |                                                        |                                                 |
|-------------------------------|----------------------------------------------------------------|---------------------|--------------------------------------------------------|--------------------------------------------------------|-------------------------------------------------|
|                               | GG<br>P value <sup>1</sup><br>P value <sup>2</sup>             | 75                  | 24.6 (3.3)<br>0.20<br>0.15                             | 26.1 (4.3)<br>0.17<br>0.16                             | -0.001 (0.015)<br><br>0.25                      |
| <i>TSPAN8,</i><br><i>LGR5</i> | AA<br>AG<br>GG<br>P value <sup>1</sup><br>P value <sup>2</sup> | 1762<br>2424<br>838 | 24.8 (3.4)<br>24.9 (3.4)<br>24.9 (3.5)<br>0.76<br>0.71 | 26.3 (4.0)<br>26.4 (4.1)<br>26.4 (4.1)<br>0.71<br>0.69 | 0<br>0.005 (0.004)<br>0.003 (0.005)<br><br>0.38 |
| <i>VEGFA</i>                  | GG<br>GA<br>AA<br>P value <sup>1</sup><br>P value <sup>2</sup> | 2611<br>2008<br>400 | 24.9 (3.4)<br>24.9 (3.5)<br>24.8 (3.2)<br>0.73<br>0.77 | 26.3 (4.0)<br>26.4 (4.2)<br>26.3 (3.9)<br>0.89<br>0.90 | 0<br>0.0 (0.004)<br>-0.004 (0.007)<br><br>0.71  |

Results are geometric mean (approximate SD)

<sup>1</sup> ANOVA, unadjusted

<sup>2</sup> ANOVA, adjusted for age and gender.
