# Supplementary material
Source: PubMed Central journal article supplement (PMC4787580)
Supplement: talp672709.wt11_default.pdf [file talp672709.wt11_default.pdf]

**Web table K** Association of genetic risk scores with type 2 diabetes risk

**a) Association of gene count score with type 2 diabetes risk**

|           | Type 2 diabetes-free<br>N=3746 | Type 2 diabetes<br>N=236 | Odds ratio (95% CI) | P value |
|-----------|--------------------------------|--------------------------|---------------------|---------|
| Mean (SD) | 20.54 (2.66)                   | 21.11 (2.59)             | 1.08 (1.03 to 1.14) | 0.001   |
| Median    | 20                             | 21                       |                     |         |

Each additional risk allele gives a 8% increase in the odds of diabetes.

**b) Distribution of simple gene score by type 2 diabetes**

| Score quintile | Type 2 diabetes-free (%) | Type 2 diabetes (%) | Odds ratio (95% CI) | P value |
|----------------|--------------------------|---------------------|---------------------|---------|
| Q1 ≤18         | 805 (21.5)               | 33 (14.0)           | 1.00                | 0.01    |
| Q2 19-20       | 1072 (28.6)              | 62 (26.3)           | 1.41 (0.92-3.17)    |         |
| Q3 21          | 538 (14.4)               | 39 (16.5)           | 1.77 (1.10-2.85)    |         |
| Q4 22-23       | 810 (21.6)               | 69 (29.2)           | 2.08 (1.36-3.18)    |         |
| Q5 ≥24         | 521 (13.9)               | 33 (14.0)           | 1.55 (0.94-2.53)    |         |

**c) Association of genetic risk function with type 2 diabetes risk**

|           | Non-Type 2 diabetes<br>N=3746 | Type 2 diabetes<br>N=236 | Odds ratio* (95% CI) | P value |
|-----------|-------------------------------|--------------------------|----------------------|---------|
| Mean (SD) | 2.47 (0.37)                   | 2.56 (0.37)              | 1.27 (1.11 to 1.44)  | <0.001  |
| Median    | 2.47                          | 2.54                     |                      |         |

\*odds ratio for a 1 standard deviation increase in genetic risk function.

**d) Distribution of genetic risk function by type 2 diabetes**

| Score quintile | Non-Type 2 diabetes (%) | Type 2 diabetes | Odds ratio (95% CI) | P value |
|----------------|-------------------------|-----------------|---------------------|---------|
| Q1 <2.171      | 772 (20.6)              | 26 (11.0)       | 1.00                | 0.003   |
| Q2 -2.372      | 748 (20.0)              | 46 (19.5)       | 1.83 (1.12 to 2.98) |         |
| Q3 -2.566      | 753 (20.1)              | 53 (22.5)       | 2.09 (1.29 to 3.38) |         |
| Q4 - 2.783     | 737 (19.7)              | 53 (22.5)       | 2.14 (1.32 to 3.45) |         |
| Q5 >2.783      | 736 (19.7)              | 58 (24.6)       | 2.34 (1.46 to 3.76) |         |
