# Supplementary material
Source: PubMed Central journal article supplement (PMC4787580)
Supplement: talp672709.wt12_default.pdf [file talp672709.wt12_default.pdf]

**Web table L** Net reclassification improvement based on the addition of the genetic risk function to the Cambridge risk score

| Predicted diabetes risk<br>Cambridge<br>risk score                                    | No. of individuals |       |        |      | Reclassified   |                | Net correctly reclassified |
|---------------------------------------------------------------------------------------|--------------------|-------|--------|------|----------------|----------------|----------------------------|
|                                                                                       | <5%                | 5-10% | 10-15% | >15% | Increased risk | Decreased risk |                            |
| <b>+ genetic risk function Individuals without diabetes during follow-up (n=3324)</b> |                    |       |        |      |                |                |                            |
| 0 - <5%                                                                               | 2021               | 172   | 0      | 0    | 269            | 208            | -1.8%                      |
| 5 - 10%                                                                               | 113                | 525   | 60     | 1    |                |                |                            |
| 10 - 15%                                                                              | 0                  | 66    | 178    | 36   |                |                |                            |
| ≥ 15%                                                                                 | 0                  | 0     | 29     | 123  |                |                |                            |
| <b>+ genetic risk function Individuals with diabetes during follow-up (n= 202)</b>    |                    |       |        |      |                |                |                            |
| 0 - <5%                                                                               | 54                 | 10    | 0      | 0    | 29             | 16             | 6.4%                       |
| 5 - 10%                                                                               | 3                  | 43    | 8      | 0    |                |                |                            |
| 10 - 15%                                                                              | 0                  | 8     | 29     | 11   |                |                |                            |
| ≥ 15%                                                                                 | 0                  | 0     | 5      | 31   |                |                |                            |
| Net reclassification improvement (95% CI) 4.6% (-2.0 to 11.3) P=0.17                  |                    |       |        |      |                |                |                            |
