# Supplementary material
Source: PubMed Central journal article supplement (PMC4787580)
Supplement: talp672709.wt13_default.pdf [file talp672709.wt13_default.pdf]

**Web table M** Net reclassification improvement based on the addition of the genetic risk function to the Framingham Offspring risk score.

| Predicted diabetes risk Framingham Offspring risk score                        | No. of individuals |       |        |      | Reclassified   |                | Net correctly reclassified |
|--------------------------------------------------------------------------------|--------------------|-------|--------|------|----------------|----------------|----------------------------|
|                                                                                | <5%                | 5-10% | 10-15% | >15% | Increased Risk | Decreased Risk |                            |
| + genetic risk function Individuals without diabetes during follow-up (n=3324) |                    |       |        |      |                |                |                            |
| 0 - <5%                                                                        | 2245               | 98    | 1      | 0    | 221            | 166            | -1.7%                      |
| 5 - 10%                                                                        | 80                 | 409   | 70     | 2    |                |                |                            |
| 10 - 15%                                                                       | 1                  | 51    | 127    | 51   |                |                |                            |
| ≥ 15%                                                                          | 0                  | 2     | 32     | 156  |                |                |                            |
| + genetic risk function Individuals with diabetes during follow-up (n= 202)    |                    |       |        |      |                |                |                            |
| 0 - <5%                                                                        | 51                 | 9     | 0      | 0    | 21             | 24             | -1.5%                      |
| 5 - 10%                                                                        | 4                  | 32    | 6      | 0    |                |                |                            |
| 10 - 15%                                                                       | 0                  | 12    | 13     | 6    |                |                |                            |
| ≥15%                                                                           | 0                  | 1     | 7      | 61   |                |                |                            |
| Net reclassification improvement (95% CI) -3.2 (-9.9 to 3.5) P=0.35            |                    |       |        |      |                |                |                            |
